1 **Title**

2 zGrad: A nanobody-based degron system to inactivate proteins in zebrafish.

3 Naoya Yamaguchi<sup>1</sup>, Tugba Colak-Champollion<sup>1</sup> and Holger Knaut<sup>1</sup>

4

5

6

7

8

9

10

11

12

13

14

15

16

17

18

19

20

21

22 1) Skirball Institute of Biomolecular Medicine, New York University School of Medicine, 540 First

23 Avenue, New York, NY 10016, USA

24

25 **Abstract**

26 The analysis of protein function is essential to modern biology. While protein function has mostly  
27 been studied through gene or RNA interference, more recent approaches to degrade proteins  
28 directly have been developed. Here, we adapted the anti-GFP nanobody-based system  
29 deGradFP from flies to zebrafish. We named this system zGrad and show that zGrad efficiently  
30 degrades transmembrane, cytosolic and nuclear GFP-tagged proteins in zebrafish in an  
31 inducible and reversible manner. Using tissue-specific and inducible promoters in combination  
32 with functional GFP-fusion proteins, we demonstrate that zGrad can inactivate transmembrane,  
33 cytosolic and nuclear proteins globally, locally and temporally with different consequences.  
34 Global protein depletion results in phenotypes similar to loss of gene activity while local and  
35 temporal protein inactivation yields more restricted and novel phenotypes. Thus, zGrad is a  
36 versatile tool to study the spatial and temporal requirement of proteins in zebrafish.

37

## 38 **Introduction**

39 The study of the consequences of the loss of gene function is a central technique in biology. In  
40 principle, loss of gene function can be achieved through gene, mRNA or protein inactivation.

41 While there are many techniques available to inactivate genes and mRNA globally, spatially and  
42 temporally (1), methods to reduce protein function in the same manners are more limited. One  
43 strategy to inactivate a specific protein is to fuse it to a degron, a protein domain that targets its  
44 fusion partner for degradation. Degrons are recognized by adapter proteins. These adapter  
45 proteins target the degron together with its fusion partner to the E3 ubiquitin ligase complex for  
46 degradation by the proteasome. By manipulating degrons with temperature, light, small  
47 molecules or another protein, protein-degron fusions can also be degraded in a controlled  
48 manner (2). Different versions of these approaches have been adapted to zebrafish (3-6) but a  
49 method to efficiently deplete proteins and compromise their function is currently not available in  
50 zebrafish.

51

52 GFP-based fluorescent proteins (FPs) are convenient degrons because they are often used to  
53 tag proteins and their degradation can be easily monitored by light microscopy. deGradFP, a  
54 system developed in flies, depletes FP-tagged proteins (7). It relies on the expression of an anti-  
55 GFP nanobody/F-box fusion protein. This fusion protein recruits FP-tagged proteins to the  
56 SKP1- CUL1-F-box (SCF) E3 ubiquitin ligase complex, leading to its ubiquitylation and  
57 proteasome-mediated degradation in two to three hours. Slight variations of this system have  
58 been used to deplete FP-tagged proteins in different tissues in nematodes (8), flies (9) and in  
59 zebrafish nuclei (4).

60

61 Here, we surveyed different degron systems in zebrafish and identified an anti-GFP  
62 nanobody/F-box fusion protein, which we named zGrad, that efficiently degrades FP-tagged  
63 proteins in zebrafish. We used this system to show that zGrad depletes FP-tagged proteins

64 within 30 to 150 minutes depending on the subcellular localization and the nature of the tagged  
65 protein. We found that zGrad-mediated protein degradation recapitulates genetic loss-of-  
66 function phenotypes and can uncover severe maternal and maternal-zygotic phenotypes. When  
67 we induced zGrad from a heat shock-inducible promoter, we found temporal degradation of FP-  
68 tagged proteins with acute and reversible loss-of-protein function phenotypes. Lastly, we  
69 expressed zGrad from a tissue-specific promoter and found degradation of FP-tagged proteins  
70 exposing a phenotype similar to but less severe than the genetic loss-of-function phenotype.  
71 These observations indicate that zGrad is a versatile tool to rapidly and reversibly deplete FP-  
72 tagged proteins with temporal or spatial control in zebrafish.

73

74

## 75 **Results**

76

### 77 **zGrad efficiently degrades GFP-tagged proteins in zebrafish**

78 To establish a method to reduce the activity of proteins in zebrafish, we tested several degra-  
79 based protein degradation systems. First, we tested the auxin-inducible degron (AID) system  
80 (10-12). This system uses the plant F box transport inhibitor response 1 (TIR1) protein to recruit  
81 proteins tagged with the small AID degron to the SCF E3 ubiquitin ligase complex in an auxin-  
82 dependent manner. We co-injected one-cell stage embryos with *sfGFP-mAID* mRNA and  
83 varying amounts of *OsTIR1-mCherry* mRNA and treated them for three hours with or without the  
84 auxin analog indole-3-acetic acid (IAA). We found that expression of *OsTIR1-mCherry* induced  
85 degradation of *sfGFP-mAID* in a dose-dependent manner irrespective of IAA (Figure 1 – figure  
86 supplements 1A). We also found that 50 pg/embryo or higher concentrations of *OsTIR1-*  
87 *mCherry* mRNA led to deformed and dying embryos (Figure 1 – figure supplements 1B, C).  
88 Thus, low levels of *OsTIR1* induce degradation of AID-tagged proteins, higher levels of *OsTIR1*

89 are toxic and OsTIR degrades AID-tagged proteins in the absence of auxin, suggesting that, in  
90 its current form, the AID system is not suitable to degrade proteins in zebrafish.

91

92 Second, we tested the ZIF1/ZF1 tag degradation system. This system uses the *C. elegans*  
93 SOCS-box adaptor protein ZIF1 which binds to the zinc-finger domain ZF1 to recruits ZF1-  
94 containing protein to the ECS (Elongin-C, Cul2, SOCS-box family) E3 ubiquitin ligase complex  
95 for proteasomal destruction (13). We co-injected one-cell stage embryos with *sfGFP-ZF1*  
96 mRNA, *ZIF1* mRNA and *mScarlet-V5* mRNA and assessed sfGFP-ZF1 degradation 9 hours  
97 later at the epiboly stage. The sequences of the ZF1 tag and ZIF1 were codon optimized for  
98 zebrafish and mScarlet-V5 served as an internal standard. Using the ratio of sfGFP to mScarlet  
99 fluorescence intensity as a measure, we found that the ZIF1/ZF1 tag degradation only reduced  
100 the levels of sfGFP-ZF1 by 17% (Figure 1 – figure supplements 2A, B), indicating that the  
101 ZIF1/ZF1 tag degradation system does not efficiently degrade ZF1-tagged proteins in zebrafish.

102

103 Third, we tested the Ab-SPOP/FP-tag degradation system. This system uses the CULLIN-  
104 binding domain from the human SPOP adaptor protein fused to the anti-GFP nanobody  
105 vhhGFP4 (4). The Ab-SPOP hybrid adaptor protein targets nuclear but not cytoplasmic FP-  
106 tagged proteins for degradation. We co-injected one-cell stage embryos with *sfGFP-ZF1* mRNA,  
107 *Ab-SPOP* mRNA or *Abmut-SPOP* mRNA and *mScarlet-V5* mRNA and assessed sfGFP-ZF1  
108 degradation 9 hours later at the epiboly stage. Abmut-SPOP is a negative control and does not  
109 bind FPs because the GFP binding domain in the nanobody is deleted. We assessed the  
110 degree of GFP degradation as the ratio of sfGFP to mScarlet fluorescence intensity in the  
111 cytoplasm and the nucleus. Consistent with the initial description (4), Ab-SPOP efficiently  
112 degraded nuclear sfGFP-ZF1 (70% reduction, Figure 1 – figure supplements 3A-C) but not  
113 cytoplasmic sfGFP-ZF1 (13% reduction, Figure 1 – figure supplements 3A-C). Abmut-SPOP did  
114 not cause any detectable sfGFP-ZF1 degradation (Figure 1 – figure supplements 3A-C). As

115 reported previously (4), this confirms that the Ab-SPOP/FP-tag degradation system degrades  
116 nuclear proteins efficiently but is not suitable for the degradation of non-nuclear proteins in  
117 zebrafish.

118

119 Fourth, we tested the deGradFP degradation system. This system uses the F-box domain from  
120 the *Drosophila* Slimb adaptor protein fused to the anti-GFP nanobody vhhGFP4 to target FP-  
121 tagged proteins for degradation (Figure 1A, B and (7)). We co-injected one-cell stage embryos  
122 with *sfGFP-ZF1* mRNA, *deGradFP* mRNA and *mScarlet-V5* mRNA and assessed sfGFP-ZF1  
123 degradation 9 hours later at the epiboly stage. As above, mScarlet-V5 served as an internal  
124 standard and GFP degradation was assessed as the ratio of GFP to mScarlet fluorescence  
125 intensity. We found that deGradFP reduced sfGFP-ZF1 only slightly (19% reduction, Figure 1C,  
126 D). Since the fusion of the anti-GFP nanobody to the Cullin-binding domain from SPOP resulted  
127 in efficient albeit only nuclear degradation of GFP, we reasoned that the anti-GFP nanobody  
128 recognizes GFP-tagged proteins but that the Slimb F-box domain is not efficiently recruited to  
129 the E3 ligase complex in zebrafish. We therefore replaced the Slimb F-box domain in deGradFP  
130 with the homologous F-box domain from zebrafish, reasoning that this should result in more  
131 efficient GFP degradation in zebrafish. Based on sequence homology we identified the  
132 zebrafish *fbxw11b* gene as the *Drosophila slmb* orthologue. We then replaced the *Drosophila* F-  
133 box domain from Slimb in deGradFP with the zebrafish F-box domain from Fbxw11b (Figure 1A,  
134 B). We named this hybrid adaptor protein zGrad for zebrafish deGradFP. To test whether zGrad  
135 degrades GFP-tagged proteins, we co-injected one-cell stage embryos with *sfGFP-ZF1* mRNA,  
136 *zGrad* mRNA and *mScarlet-V5* mRNA and assessed sfGFP-ZF1 degradation 9 hours later at  
137 the epiboly stage using the ratio of sfGFP to mScarlet fluorescence intensity. In contrast to  
138 deGradFP, which depleted 19% of sfGFP-ZF1, zGrad depleted sfGFP-ZF1 in both the  
139 cytoplasm and the nucleus by 89% (Figure 1C, D). This indicates that zGrad efficiently targets

140 tagged GFP in the cytoplasm for degradation and should be suitable for assessing protein  
141 function in zebrafish.

142

### 143 **zGrad degrades nuclear, transmembrane and cytoplasmic FP-tagged proteins**

144 Next, we asked whether zGrad degrades GFP-tagged proteins in different cellular  
145 compartments using a transgenic line that expresses zGrad from a heat shock inducible  
146 promoter in the embryo (*hsp70l:zGrad*).

147

148 First, we tested whether zGrad degrades the nuclear protein Histone 2A (H2A). We generated  
149 *hsp70l:zGrad* embryos that also expressed H2A-EGFP and H2A-mCherry from two identical 69  
150 kb genomic fragments spanning the *cxcr4b* locus (*cxcr4b:H2A-GFP*; *cxcr4b:H2A-mCherry*).  
151 Among other tissues, the *cxcr4b* promoter drives expression in the somites and the posterior  
152 lateral line primordium (primordium) (14). Such embryos were heat shocked at 30 hpf for one  
153 hour and imaged over 9.5 hours. Compared to control embryos that did not carry the  
154 *hsp70l:zGrad* transgene, H2A-EGFP degradation was discernible in zGrad-expressing embryos  
155 within two to three hours post heat shock in all tissues that expressed nuclear EGFP from the  
156 *cxcr4b* promoter (skin, pronephros, somites, neural tube and primordium, Figure 2A-E, Figure 2  
157 – Video 1). We quantified H2A-EGFP levels in heat-shocked control embryos and heat-shocked  
158 *hsp70l:zGrad* embryos using the fluorescence intensity of H2A-mCherry as a reference. Since  
159 H2A-mCherry was expressed from the same promoter as H2A-EGFP and since H2A-mCherry  
160 is not recognized by the anti-GFP nanobody and should not be subjected to zGrad-mediated  
161 protein degradation (7), comparing the ratio of H2A-mCherry expression levels to H2A-EGFP  
162 should be a measure of H2A-EGFP in the absence of zGrad-mediated degradation. Further, we  
163 normalized the H2A-EGFP-to-H2A-mCherry fluorescence intensity ratios between zGrad-  
164 expressing and heat-shocked control embryos. In the somites, the levels of H2A-EGFP was  
165 decreased by 87%, while in the primordium, the levels of H2A-EGFP was decreased by 22%

166 (Figure 2C). The more efficient degradation of H2A-EGFP in the somites than in the primordium  
167 is probably due to the lower levels of H2A-EGFP and the lack of H2A-EGFP production in the  
168 somites at the time of zGrad induction.

169

170 We further characterized the kinetics of zGrad-mediated degradation by determining the time  
171 interval between the start of the heat shock to induce zGrad expression and the first observable  
172 difference in EGFP/mCherry levels between zGrad-expressing embryos and the control  
173 embryos. We termed this time interval as the time for onset of degradation. We also fitted the  
174 EGFP/mCherry ratio to a one-phase exponential decay model to extract the half-life of zGrad-  
175 mediated degradation. Although this is a simplification because the model does not account for  
176 EGFP production – a variable that we cannot easily measure – we expect that it gives a rough  
177 estimate for the time it takes to degrade a GFP-tagged protein once zGrad is expressed. The  
178 time for onset of degradation and half-life for H2A-EGFP in the somites was 200 min and 156  
179 min, respectively. The time for onset of degradation and the half-life for H2A-EGFP degradation  
180 in the primordium was 140 min and 29 min, respectively (Table 2).

181

182 Second, we tested whether zGrad degrades the transmembrane protein E-Cadherin (Cdh1). We  
183 generated two transgenes that express Cdh1-sfGFP and Cdh1-TagRFP from a 72 kb genomic  
184 fragment spanning the *cdh1* locus (*cdh1:cdh1-sfGFP*; *cdh1:cdh1-TagRFP*). These transgenes  
185 recapitulated the endogenous Cdh1 expression pattern and rescued the lethality of *cdh1* mutant  
186 embryos (Table 1), indicating that Cdh1-sfGFP and Cdh1-TagRFP are functional. Using these  
187 lines, we generated *hsp70l:zGrad*; *cdh1:cdh1-sfGFP*; *cdh1:cdh1-TagRFP* embryos and  
188 *cdh1:cdh1-sfGFP*; *cdh1:cdh1-TagRFP* control embryos. These embryos were heat shocked at  
189 31 hpf for one hour and imaged the embryos for 4.8 hours. In zGrad-expressing embryos,  
190 Cdh1-sfGFP degradation was uniformly detected within 10 min post heat shock in the skin of  
191 the embryo (enveloping layer and epidermal basal layer) (Figure 2F-H, Figure 2 – Video 2). As



192 detailed above for the quantification of zGrad-mediated H2A-EGFP degradation, we used the  
193 fluorescence intensity of Cdh1-TagRFP as a reference to quantify the reduction of Cdh1-sfGFP.  
194 We divided the Cdh1-sfGFP fluorescence intensity by the Cdh1-TagRFP fluorescence intensity  
195 and normalized the ratio in the zGrad-expressing embryos to the ratio in the heat-shocked  
196 control embryos. This analysis showed that zGrad expression reduced the levels of Cdh1-  
197 sfGFP in the primordium by 79 % with a degradation half-life of 24 min (Figure 2H). The time for  
198 onset of Cdh1-sfGFP degradation was 75 min (Table 2).

199

200 Third, we tested whether zGrad degrades the cytoplasmic protein  $\alpha$ E-Catenin (Ctnna). To  
201 address this, we used a gene trap line that expresses  $\alpha$ E-Catenin-Citrine (Ctnna-Citrine) from  
202 the *ctnna* locus (15, 16). Homozygous *ctnna-Citrine* fish are viable, indicating that Ctnna-Citrine  
203 is functional (15). We generated *hsp70l:zGrad; ctnna:ctnna-Citrine/+* embryos and *ctnna:ctnna-*  
204 *Citrine/+* control embryos and heat shocked these embryos at 31 hpf for one hour and imaged  
205 the embryos for 8 hours. In contrast to heat-shocked control embryos, Ctnna-Citrine was  
206 degraded in zGrad-expressing embryos (Figure 2I, J). Since Ctnna tagged with a red  
207 fluorescent protein is not available, we could not perform a ratiometric analysis and instead  
208 quantified the total Ctnna-Citrine fluorescent intensity. This analysis showed that the time for  
209 onset of degradation of Ctnna-Citrine was 65 min and that Ctnna-Citrine was degraded by 58%  
210 with a half-life of 19 min in zGrad-expressing embryos (Figure 2K, Table 2).

211

212 Finally, we tested whether zGrad degrades EGFP targeted to the secretory pathway by a signal  
213 peptide. Using fish that express secreted EGFP and secreted mCherry from a heat shock  
214 promoter (*hsp70l:sec-GFP; hsp70:sec-mCherry*), we generated *hsp70l:sec-GFP; hsp70:sec-*  
215 *mCherry; hsp70l:zGrad* embryos and *hsp70l:sec-GFP; hsp70:sec-mCherry* control embryos.

216 Unlike H2A-EGFP, Cdh1-sfGFP and Ctnna-Citrine, expression of zGrad did not degrade  
217 secreted GFP (Figure 2 – figure supplement 1A).

218

219 Together, these observations indicate that zGrad efficiently targets nuclear, cytoplasmic, and  
220 transmembrane proteins tagged with EGFP or Citrine for degradation.

221

### 222 **zGrad-mediated protein degradation results in loss of protein function**

223 Since zGrad efficiently degrades proteins from different cellular compartments (Figure 2), we  
224 asked whether we can use zGrad-mediated protein depletion to replicate known loss of protein  
225 function phenotypes and uncover novel ones. We addressed this question in several ways.

226 First, we tested whether zGrad degrades cytoplasmic Ctnna-Citrine to disrupt its function in cell-  
227 cell adhesion (17). We injected *zGrad* mRNA or *sfGFP* control mRNA into one-cell stage  
228 embryos that were maternal-zygotic Ctnna-Citrine (*MZ ctnna:ctnna-Citrine*, Figure 3A), maternal  
229 Ctnna-Citrine (*M ctnna:ctnna-Citrine*, Figure 3D) or zygotic Ctnna-Citrine (*Z ctnna:ctnna-Citrine*,  
230 Figure 3G). In *zGrad* mRNA-injected *MZ ctnna-Citrine* and *M ctnna-Citrine* embryos the cells  
231 started to become detached and partly shed from the embryo resulting in embryonic lethality  
232 around 3 to 5 hpf (Figure 3B, C, E, F, H, I). Control embryos injected with *sfGFP* mRNA  
233 developed normally (Figure 3B, C, E, F, H, I). Similarly but delayed by 20 hours, in *zGrad*  
234 mRNA-injected *Z ctnna-Citrine* embryos, cells detached from the embryo by 24 hpf and about  
235 half of the embryos died (note, half the embryos are zygotically homozygous for *ctnna:ctnna-*  
236 *Citrine* since we crossed *ctnna:ctnna-Citrine/ctnna:ctnna-Citrine* males to *ctnna:ctnna-Citrine/+*  
237 females, Figure 3H, I) while control injected embryos were unaffected (Figure 3H, I). The  
238 observed phenotype in *Z ctnna-Citrine* embryos injected with *zGrad* mRNA is similar to the  
239 defects reported for zygotic *ctnna-/-* embryos (18). Thus, zGrad depletes Ctnna-Citrine to levels  
240 too low to sustain cell-cell adhesion and embryonic development. Moreover, it suggests that

241 maternally supplied Ctnna can sustain cell-cell adhesion and embryonic development for about  
242 one day before the embryo requires zygotic Ctnna.

243

244 Second, we tested whether zGrad degrades transmembrane Cdh1-sfGFP efficiently enough to  
245 disrupt its function (19-21) and uncover late requirements of Cdh1 in cell-cell adhesion. Such an  
246 analysis is currently not possible because *cdh1*<sup>-/-</sup> embryos die during late gastrulation stages  
247 (22-24). To address this, we crossed *hsp70l:zGrad; cdh1*<sup>+/-</sup>; *cdh1:cdh1-sfGFP* fish to *cdh1*<sup>+/-</sup>  
248 fish and as a control *cdh1*<sup>+/-</sup>; *cdh1:cdh1-sfGFP* fish to *cdh1*<sup>+/-</sup> fish. We separated *cdh1:cdh1-*  
249 *sfGFP* transgenic from *cdh1:cdh1-sfGFP* non-transgenic embryos from both crosses and  
250 separately heat-shocked the embryos for one hour at 25 hpf (Figure 4A). In contrast to control  
251 embryos which showed no visible defects (Figure 4C, E), we found that 2.4% of the heat-  
252 shocked *cdh1:cdh1-sfGFP* embryos shed their skin and rapidly died (Figure 4B, D), consistent  
253 with the idea that zGrad-mediated Cdh1-sfGFP degradation disrupts the cell-cell adhesion  
254 between the skin cells of the embryos that lack Cdh1 function. While the expected fraction of  
255 embryos that should lose Cdh1 activity and display a phenotype is 6.25% (*cdh1*<sup>-/-</sup>;  
256 *hsp70l:zGrad; cdh1:cdh1-sfGFP* embryos, Figure 4 – figure supplement 1A), we believe that not  
257 all embryos had enough Cdh1 protein depleted to cause a cell-cell adhesion defect due to the  
258 variability in zGrad levels. These observations suggest that transient expression of zGrad can  
259 efficiently degrade GFP-tagged proteins and, if GFP-tagged proteins are depleted sufficiently,  
260 cause loss of protein function and uncover phenotypes past the initial requirements of essential  
261 proteins.

262

263 Third, we asked whether induction of zGrad can degrade the Sdf1 chemokine receptor Cxcr4b  
264 tagged with EGFP to temporarily disrupt its function as a guidance receptor for the migration of  
265 the primordium (25, 26). For this, we heat shocked *hsp70l:zGrad; cxcr4b*<sup>-/-</sup>; *cxcr4b:cxcr4b-*  
266 *EGFP-IRES-Kate2-CaaX-p7* embryos and *cxcr4b*<sup>-/-</sup>; *cxcr4b:cxcr4b-EGFP-IRES-Kate2-CaaX-p7*

267 control embryos at 28 hpf when the primordium has completed a third of its migration along the  
268 body of the embryo and recorded the levels of Cxcr4b-EGFP and the migration of the  
269 primordium by time lapse microscopy. Cxcr4b-EGFP expressed from the *cxcr4b:cxcr4b-EGFP-*  
270 *IRES-Kate2-CaaX-p7* transgene restores the migration of the primordium in *cxcr4b-/-* embryos  
271 and Kate2-CaaX expressed from an internal ribosomal entry site (IRES) serves as a marker for  
272 the primordium and an internal reference for how much Cxcr4b-EGFP is produced (27, 28). This  
273 analysis showed that induction of zGrad degraded Cxcr4b-EGFP (Figure 5A, B, E) and resulted  
274 in rounded primordium morphology (Figure 5A, C) and stalled primordium migration (Figure 5A,  
275 D, E) 90 min after heat shock. After 120 min newly produced Cxcr4b-EGFP was detectable  
276 again and the primordium resumed its migration (Figure 5A, Figure 5 – Video 1). Thus, a pulse  
277 of zGrad expression can deplete Cxcr4b-EGFP to levels unable to sustain directed cell  
278 migration of the primordium. This suggests that temporal zGrad induction from the heat shock  
279 promoter can be used to induce reversible protein loss of function scenarios.

280

281 Fourth, we asked whether tissue-specific expression of zGrad from the *cxcr4b* promoter can  
282 degrade Cxcr4b-EGFP and recapitulate the *cxcr4b* mutant primordium migration phenotype  
283 (25). To address this question, we expressed zGrad from a 69 kb genomic fragment spanning  
284 the *cxcr4b* locus (*cxcr4b:zGrad*) (Figure 6A). The expression pattern of zGrad mRNA in  
285 *cxcr4b:zGrad* embryos faithfully recapitulated the *cxcr4b* mRNA expression pattern (Figure 6B).  
286 We crossed this line into the *cxcr4b:cxcr4b-EGFP-IRES-Kate2-CaaX-p1; cxcr4b-/-* background  
287 and determined the degree of Cxcr4b-EGFP degradation compared to Kate2-CaaX expression  
288 in primordia of *cxcr4b:zGrad* embryos and control embryos. Similar to the *cxcr4b:cxcr4b-EGFP-*  
289 *IRES-Kate2-CaaX-p7* transgenic line used above, the *cxcr4b:cxcr4b-EGFP-IRES-Kate2-CaaX-*  
290 *p1* fully restores primordium migration in *cxcr4b* mutant embryos, however, it expresses Cxcr4b-  
291 EGFP at two-fold lower levels (29). This analysis showed that zGrad efficiently depleted Cxcr4b-  
292 EGFP below detectable levels (Figure 6C, D). Next, we assessed the primordium migration by

293 staining for *cxcr4b* mRNA at 38 hpf. In *cxcr4b* mutant control embryos that carried the rescuing  
294 *cxcr4b:cxcr4b-EGFP-IRES-Kate2-CaaX-p1* transgene but lacked the *cxcr4b:zGrad* transgene,  
295 the primordium completed its migration and deposited the same number of neuromasts with the  
296 same spacing as in wild-type embryos (Figure 6E, F, figure supplement 1B). In contrast,  
297 embryos with the *cxcr4b:zGrad* transgene migrated on average only 72.5% of the distance  
298 (Figure 6E, F). Compared to primordia in *cxcr4b*<sup>-/-</sup> embryos, which showed little to no directed  
299 migration (Figure 6E, F) (25) primordia in *cxcr4b*<sup>-/-</sup>; *cxcr4b:cxcr4b-EGFP-IRES-Kate2-CaaX-p1*;  
300 *cxcr4b:zGrad* embryos migrated directionally but at reduced speed, did not fully complete their  
301 migration and failed to deposit the terminal neuromasts by 4 dpf (Figure 6E, F – figure  
302 supplement 1B, C). Importantly, expression of zGrad in the primordium did not affect its  
303 migration (Figure 6 – figure supplement 1A). This suggests that zGrad expression from the  
304 *cxcr4b* promoter efficiently degrades Cxcr4b-EGFP to levels low enough to slow primordium  
305 migration but not low enough to recapitulate the primordium migration defect observed in  
306 embryos with loss of Cxcr4b function, probably because the *cxcr4b* promoter does not express  
307 zGrad at high enough levels for complete degradation of Cxcr4b-EGFP driven from the same  
308 promoter. More generally, these observations indicate that expression of zGrad from a tissue-  
309 specific promoter can result in efficient degradation of GFP-tagged proteins to levels low  
310 enough to perturb protein function and cause tissue-specific defects.

311

312

### 313 **Discussion**

314 In our study, we sought to develop a tool that allows for the acute inactivation of proteins in  
315 zebrafish. We modified the anti-GFP nanobody-based deGradFP system from flies (9) and  
316 adapted it to zebrafish and named it zGrad. zGrad efficiently degrades GFP-tagged  
317 transmembrane, cytoplasmic and nuclear proteins. It recognizes different GFP versions (EGFP,  
318 sfGFP and Citrine, Figure 1 and 2) and targets the tagged proteins for degradation. In contrast

319 to other degron systems (2) and similar to deGradFP (7), zGrad degraded proteins tagged at  
320 the N-terminus, embedded within the protein and at the C-terminus in the examples reported  
321 here (Figure 1 and 2). We found that zGrad rapidly degrades GFP-tagged proteins with half-  
322 lives of around 20 min for transmembrane and cytoplasmic proteins (Figure 2 and Table 2).  
323 These kinetics are similar to the kinetics reported for other degron-based systems (5, 11, 13).  
324 The degradation of H2A-EGFP was significantly slower displaying a half-life of about 2.5 h  
325 (Figure 2 and Table 2). This is could be due to the long life-time of histone proteins (30) and the  
326 possibility that protein degradation is less efficient in nuclei. Importantly, in our system zGrad  
327 expression needs to be induced. This delays the onset of degradation by 65 to 200 min for the  
328 proteins we investigated. Nevertheless, zGrad degrades proteins rapidly enough to assess the  
329 consequences of abrupt protein inactivation.

330

331 One simple use of zGrad is the study of the contribution of maternally supplied proteins in early  
332 development. Depletion of maternal proteins by expressing zGrad from injected mRNA should  
333 uncover early protein requirements and can circumvent the laborious process of generating  
334 maternal mutants for essential genes by germline replacement (31). Our finding that the  
335 depletion of maternal Ctnna results in an early and severe cell-cell adhesion defect is consistent  
336 with this idea (Figure 3). Alternatively, a pulse of zGrad should allow one to dissect the temporal  
337 requirements of proteins. Depending on the protein function this could result in a reversible  
338 phenotype as observed when we transiently stalled the migration of the primordium by depleting  
339 Cxcr4b (Figure 5) or to an irreversible phenotype if the function of the protein is continually  
340 required for viability as observed when we depleted Cdh1 and disrupted the integrity of the  
341 embryo (Figure 4). Another use of zGrad is to deplete proteins from certain tissues. By  
342 expressing zGrad from tissue-specific promoters, one can circumvent essential early  
343 requirements, assess later protein functions and disentangle the contribution of tissues to

344 complex phenotypes. Our observation that depletion of *Cxcr4b* in the primordium by expressing  
345 zGrad from the *cxcr4b* promoter results in slowed migration supports this idea (Figure 6).

346

347 An important consideration is that zGrad needs to be expressed at high enough levels to  
348 deplete proteins to sufficiently low levels to fully disrupt protein function. One way to achieve  
349 high tissue-specific zGrad expression is to amplify the production of zGrad through such  
350 systems as Gal4/UAS (32) or – to also add temporal control – inducible systems such as the  
351 Tet-On system (33). Such modifications combined with the increasing number of GFP-tagged  
352 transgenic (15, 34) and knock-in lines (35) should render zGrad as a useful tool for the study of  
353 the consequences of acute loss of protein function in zebrafish, possibly also circumventing the  
354 problem of genetic compensation observed in studies of genetic mutants (36).

355

356

## 357 **Materials and Methods**

### 358 **Zebrafish strains**

359 Embryos were staged as previously described (37). Hours post fertilization (hpf) was used to  
360 determine the developmental age of the embryos. Embryos were incubated at 28.5 °C from  
361 one-cell-stage (0 hpf) until the indicated time. *cxcr4b*<sup>t26035</sup> (38) homozygous mutant embryos  
362 were generated by inbreeding heterozygous adults, crossing homozygous adult with  
363 heterozygous adults or inbreeding homozygous adults. *tg(cxcr4b:cxcr4b-EGFP-IRES-Kate2-  
364 CaaX)* (27, 28) embryos were generated by crossing heterozygous adults with wild-type adults  
365 and sorted by GFP expression. *Gt(ctnna-citrine)Ct3a* (15) lines were maintained by inbreeding  
366 of heterozygous adults or homozygous adults. *cdh1(tx230)* (22) were kept as heterozygous  
367 adults and *cdh1* homozygous embryos were generated by inbreeding heterozygous adults. The  
368 *hsp70:sec-mCherry* (39), *cxcr4b:cxcr4b-EGFP-IRES-Kate2-CaaX-p1* (28), *cxcr4b:cxcr4b-  
369 EGFP-IRES-Kate2-CaaX-p7* (27), *cxcr4b:H2A-EGFP* (40) and *cxcr4b:H2A-mCherry* (39) were

370 previously described. Zebrafish were maintained under the approval from IACUC (protocol  
371 number: 170105-02).

372

### 373 **Generation of transgenic animals**

#### 374 *hsp70l:zGrad-IRES-h2a-TagBFP*

375 *zGrad*, *IRES-h2a* and *TagBFP* sequences were amplified by PCR and cloned into the plasmid  
376 *pDEST-tol2-hsp70l* (41) by Gibson assembly (42). *pDEST-tol2-hsp70l* contains a genomic  
377 fragment spanning 1.5 kb upstream of the *hsp70l* start codon (43). 50 ng/μl of the *pDEST-tol2-*  
378 *hsp70l-zGrad-IRES-TagBFP* plasmid was co-injected with 25 ng/μl *tol2* mRNA into one-cell-  
379 stage embryos. Founder fish were identified by *in situ* hybridization against *vhhgfp4* sequence  
380 of heat-shocked offspring. Briefly, adult fish that were injected as embryos were outcrossed with  
381 wild-type adults and embryos were collected. At the shield stage, the embryos were heat-  
382 shocked at 39.5 °C for 30 min. Preparation of the antisense RNA probe and whole-mount *in situ*  
383 hybridization were performed as previously described (38). Fish that gave rise to *hsp70l:zGrad-*  
384 *IRES-H2A-TagBFP* offspring were kept as founder fish. *zGrad* activity was confirmed by heat  
385 shocking *hsp70l:zGrad-IRES-H2A-TagBFP; cxcr4b:h2a-EGFP* embryos and observation of  
386 H2A-GFP degradation. The line from the founder that showed the strongest GFP degradation  
387 was kept and used in this study. The full name of this line is *tg(hsp70l:zGrad-IRES-H2A-*  
388 *TagBFP)p1*. Note H2A-TagBFP expression from the IRES is not detectable in this line.

389

#### 390 *cxcr4b:zGrad-IRES-h2a-TagBFP*

391 For the *cxcr4b:zGrad-IRES-h2a-TagBFP* BAC transgene, we used the BAC clone DKEY-  
392 169F10 (44). This BAC clone contains the *cxcr4b* locus. We modified this BAC in two ways by  
393 recombineering. First, we modified pBS-IndHom-Tol2-FRT-Galk-cryaa-dsRed (Addgene  
394 plasmid # 73203, (29)) by replacing the *cryaa:dsRed* sequence with *myl7:mScarlet* and the  
395 FRT-Galk-FRT sequence with the *kanR* sequence. The *myl7* (synonym *cmlc2*) promoter drives



396 expression in the myocardium (45) and *kanR* allows for rapid kanamycin-based selection of  
397 recombinants. The full name of this plasmid is *pBS-IndHom-Tol2(exon4)-Kan-Tol2(exon1)-*  
398 *myl7:mScarlet-Hom*. We amplified *Tol2(exon4)-Kan-Tol2(exon1)- myl7:mScarlet* cassette by  
399 PCR and inserted it into the *pIndigoBAC-5* backbone of the DKEY-169F10 BAC clone using  
400 *kanamycin* as a selection marker. Second, a cassette containing *zGrad-IRES-h2a-TagBFP-*  
401 *FRT-galk-FRT* flanked by homology arms upstream of the *cxcr4b* exon2 and downstream of the  
402 *cxcr4b* stop codon was inserted to replace the *cxcr4b* coding sequence in exon2 using *galk* as  
403 a selection marker. The *galk* cassette was removed by Flippase. The obtained BAC was  
404 characterized with sequencing the modified region in the BAC and *EcoRI* finger printing. This  
405 transgene expresses *zGrad-IRES-H2A-TagBFP* fused to 5 amino acids from *cxcr4b* exon1  
406 under the *cxcr4b* promoter. The BAC was prepared with the nucleobond BAC 100 kit  
407 (Clontech) and co-injected with 25 ng/μl *tol2* mRNA into one-cell-stage embryos. Stable  
408 transgenic animals were identified by out-crossing injected adults and screening for the red  
409 hearts in 4 dpf larvae. Embryos were collected from each stable transgenic fish and tested for  
410 expression of *zGrad* by whole mount *in situ* hybridization 30 hpf. We selected the transgenic line  
411 that expressed the highest level of *zGrad* from the BAC transgene and used it in this study. The  
412 full name of this transgenic line is *TgBAC(cxcr4b:zGrad-IRES-h2a-TagBFP)p3*. Note H2A-  
413 TagBFP expression from the IRES is not detectable in this line.

414

415 For the *hsp70l:sec-GFP* transgene, the *pDestTol2pA-hsp70l-anos1b-sv40pA* plasmid was used  
416 as a template (39). Using Gibson cloning (42), we replaced the *anos1b* coding sequence with  
417 the coding sequence of *GFP* fused to the 3' end of the *fgf3* secretion signal (amino acids 1 to  
418 18). We verified the final construct by sequencing and co-injected it along with *tol2* transposase  
419 mRNA into zebrafish embryos at the one-cell stage. Stable transgenic fish were identified by  
420 out-crossing adults injected with the transgene and raising larvae from fish whose offspring  
421 were identified to express GFP upon heat shock as determined by green fluorescence. Founder

422 fish were verified to carry a single copy of the transgene by determining the fraction of progeny  
423 carrying the transgene. The full name of this transgenic line is *Tg(hsp70l:sec-GFP)p1*.

424

425 *cdh1:cdh1-sfGFP* and *cdh1:cdh1-TagRFP* lines

426 For the *cdh1:cdh1-sfGFP* and *cdh1:cdh1-TagRFP* BAC transgenes, we used the BAC clone

427 CHORI-211-175C23. This BAC clone spans 72 kb of genomic sequence and contains the *cdh1*

428 locus and was modified in two ways by recombineering. First, the *Tol2* sites and the

429 *cryaa:Cerulean* transgenesis marker were inserted into the BAC backbone (29). Second, a

430 cassette consisting of *sfGFP-FRT-galk-FRT* or *TagRFP-FRT-galk-FRT* flanked by 446 bp and

431 590 bp of homology upstream of the stop codon in *cdh1* exon 16, and downstream of the stop

432 codon in *cdh1* exon 16, respectively, was inserted before the *cdh1* stop codon using galk-

433 mediated recombineering (46). The galk cassette was removed by Flippase-mediated

434 recombination. This transgene expresses the full length of Cdh1 fused to sfGFP or TagRFP

435 from the *cdh1* promoter. The final BAC transgenes were characterized by EcoRI restriction

436 digestion and sequencing of PCR amplicons of the modified locus. The CHORI-211-175C23

437 BAC clone was obtained from BACPAC Resources, Children' Hospital Oakland Research

438 Institute, CA, USA ([bacpacorders@chori.org](mailto:bacpacorders@chori.org)). The BACs were purified with the nucleobond

439 BAC 100 kit (Clontech). We co-injected 1 nl of 40 ng/μl *Tol2* mRNA and 50–250 ng/μl of the

440 *cdh1:cdh1-sfGFP* or *cdh1:cdh1-TagRFP* BAC transgene DNA into the lifting cell of the zygote of

441 0 to 20-minute old embryos. The *Tol2* mRNA was transcribed from the pCS2FA-transposase

442 plasmid (41) using the mMessage mMachine SP6 Transcription Kit (Thermo Fisher). Stable

443 transgenic larvae were identified by out-crossing adults injected with the *cdh1:cdh1-sfGFP* or

444 *cdh1:cdh1-TagRFP* BAC transgenes, and by raising larvae positive for the blue fluorescent

445 transgenesis marker in the lens of the eye at 4 dpf. The full names of these two transgenic lines

446 are *TgBAC(cdh1:cdh1-sfGFP)p1* and *TgBAC(cdh1:cdh1-TagRFP)p1*.

447

448 **Generation of plasmids for *in vitro* transcription**

449 To construct *pCS2+-mScarlet-V5*, the *mScarlet* coding sequence was amplified from pmScarlet-  
450 C1 (Addgene plasmid # 85042, (47)) by PCR with a 5' primer containing V5-tag sequence and  
451 cloned into *pCS2+* plasmid by Gibson assembly. To construct *pCS2+-sfGFP*, *sfGFP* coding  
452 sequence was amplified by PCR and cloned into *pCS2+* plasmid by Gibson assembly.

453 To construct *pCS2+-Nslmb-vhhGFP4*, *Nslmb-vhhGFP4* coding sequence was amplified from  
454 *pcDNA3-NSlmb-vhhGFP4* (Addgene plasmid #35579, (7)) by PCR and cloned into *pCS2+*  
455 plasmid by Gibson assembly.

456 To construct *pCS2+-OsTIR1-mCherry*, the *OsTIR1* and *mCherry* coding sequences were  
457 amplified from *pMK232-CMV-OsTIR1-PURO* (Addgene plasmid #72834, (10)) and *pCS2+-*  
458 *lyn2mCherry* (kind gift from Reinhard Köster and Scott Fraser) respectively, by PCR and cloned  
459 into *pCS2+* plasmid by Gibson assembly.

460 To construct *pCS2+-sfGFP-mAID*, the *sfGFP* coding sequence was amplified by PCR and the  
461 mAID tag sequence (48) was generated by primer annealing and cloned into *pCS2+* plasmid by  
462 Gibson assembly.

463 To construct *pCS2+-fbxw11b-vhhGFP (pCS2+-zGrad)*, the coding sequence for the N-terminal  
464 217 amino acids of Fbxw11b was amplified by PCR from cDNA of 36 hpf embryos, fused to the  
465 *vhhGFP4* coding sequence and inserted into the *pCS2+* plasmid by Gibson assembly.

466 To construct *pCS2+-zif1*, the coding sequence of *zif1* was codon optimized for zebrafish by  
467 gene synthesis (IDT) and inserted into the *pCS2+* plasmid by Gibson assembly.

468 To construct *pCS2+-sfGFP-ZF1*, the coding sequence of *ZF1* was codon optimized for zebrafish  
469 by gene synthesis (IDT) and inserted together with *sfGFP* into the *pCS2+* plasmid by Gibson  
470 assembly.

471 The *pCS2+-vhhGFP4-hSPOP* and *pCS2+-vhhGFPmut-hSPOP* plasmids were previously  
472 described (4).

473

474 **mRNA injection**

475 Templates for *in vitro* mRNA transcription were generated by PCR or restriction digest of mRNA  
476 expression plasmids. mRNAs were transcribed using the mMMESSAGE mMACHINE SP6  
477 transcription Kit (Thermo Fisher Scientific). Injection mixes contained 50 ng/μl mRNAs except  
478 for the mAID experiment, where *OsTIR1-mCherry* mRNA was prepared as 10 ng/μl, 5 ng/μl and  
479 1 ng/μl, with 0.1% Phenol Red Solution (LIFE TECHNOLOGIES). The injection mix was injected  
480 in one-cell-stage embryos. mRNA quality was assessed after injection through gel  
481 electrophoresis by collecting the remaining mix in the injection needle assessing intactness of  
482 mRNA.

483

484 **Auxin inducible degradation**

485 Natural auxin 3-Indoleacetic acid (IAA, Sigma Aldrich) was dissolved in 100% ethanol at a  
486 concentration of 250 mM, protected from light and stored at -20 °C. Injected embryos were  
487 raised in fish water (4g/l instant ocean salt) without Methylene blue to avoid possible  
488 interference from the dye. 50 ng/μl *sfGFP-mAID* mRNA was co-injected with 10 ng/μl, 5 ng/μl or  
489 1 ng/μl *OsTIR1-mCherry* mRNA. Injected embryos were dechorionated manually. At 8 hpf IAA  
490 was added to 500 μM final concentration (5, 49). Images were taken on a Leica 165M FC  
491 Fluorescent Stereo Microscope equipped with a Leica DFC345 FX camera every hour for 3  
492 hours.

493

494 **Image acquisition and quantification of mRNA-injected embryos**

495 To quantify the ratio of sfGFP-ZF1 fluorescence to mScarlet-V5 fluorescence, injected embryos  
496 were dechorionated manually or by adding Pronase (Sigma Aldrich) to 0.3 mg/ml on petri dishes  
497 coated with 2% agarose in fish water at 10 hpf. Injected embryos were mounted in 0.5% low-  
498 melt agarose (National Diagnostics)/Ringer's solution (MgSO<sub>4</sub> 0.6 mM, CaCl<sub>2</sub> 1 mM, KCl 5 mM,  
499 NaCl 111 mM, HEPES 5 mM) on a slide. Mounted embryos were imaged on Leica SP5 II

500 confocal microscope equipped with HyD detectors (Leica Microsystems) using a Leica 20x (NA  
501 0.7) objective and a Leica 40x water immersion lens (NA 1.1) in the case of vhhGFP4-hSPOP-  
502 mediated GFP degradation.

503

504 All images were collected in the photon-counting mode with identical microscope settings.  
505 Quantification of signal intensity from injected embryos was performed using a custom-written  
506 ImageJ macro (Data File 1). Briefly, the macro selects a single Z-slice and generates a mask  
507 based on the mScarlet intensities using the Otsu thresholding algorithm. The mScarlet mask is  
508 then applied to the green and red channels of the same Z-slice to extract average GFP and  
509 mScarlet signal intensities only from the masked region. These procedures is repeated on the  
510 whole Z-stack. Average signal intensities from the first 40 Z-slices (62  $\mu\text{m}$ ) starting at the animal  
511 pole were used to calculate the green-to-red fluorescence intensity ratio of an embryo. The  
512 sfGFP-ZF1/mScarlet-V5 fluorescence intensity ratios for vhhGFP4-hSPOP-mediated GFP  
513 degradation were calculated manually using ImageJ. Briefly, five nuclei per embryo were  
514 outlined and the average nuclear signal intensities in the green and red channels was extracted  
515 and used for the calculation of the green-to-red fluorescence intensity ratios in the nuclei. For  
516 quantification of signal intensities in the cytoplasm, a 20 x 20 pixels (3.79  $\mu\text{m}$  x 3.79  $\mu\text{m}$ ) region  
517 was manually selected and the average signal intensities in the green and red channels were  
518 extracted to calculate the green-to-red fluorescence intensity ratio. The regions from five cells  
519 per embryo for five embryos were analyzed for each condition. The overview fluorescence  
520 images in Figure 1 – figure supplements 1A (AID) were collected on Leica 165M FC Fluorescent  
521 Stereo Microscope equipped with a Leica DFC345 FX camera.

522

### 523 **Heat shock regimens**

524 To determine the degradation kinetics of H2A-EGFP, *cxcr4b:h2a-EGFP*; *cxcr4b:h2a-mCherry*  
525 embryos with and without the *hsp70l:zGrad-IRES-h2a-TagBFP* transgene were heat shocked

526 around 29-30 hpf at 39.5 °C for one hour in a water bath and imaged 80 min after the end of  
527 heat shock every 10 min for 9.5 hours on a Leica SP5 II confocal microscope equipped with  
528 HyD detectors (Leica Microsystems) using a 20x (NA 0.5) objective. Laser power was calibrated  
529 as 30 µW for 488 and 120 µW for 561. Pinhole was set to 85 µm.

530 To determine the degradation kinetics of Cdh1-sfGFP, *cdh1:cdh1-sfGFP; cdh1:cdh1-TagRFP*  
531 embryos with and without the *hsp70l:zGrad-IRES-h2a-TagBFP* transgene were mounted in the  
532 0.5% low-melt agarose/Ringer's solution with tricane, heat shocked around 31 hpf at 39.5 °C for  
533 30 min in a water bath and imaged 35 min after the end of heat shock every 10 min for 4.8  
534 hours on a Leica SP5 II confocal microscope equipped with HyD detectors (Leica  
535 Microsystems) using a 40x (NA 0.8) objective. The laser power was calibrated to 32 µW for the  
536 488 nm laser line and 115 µW for the 594 nm laser line. The pinhole was set to 230 µm.

537 To determine the degradation kinetics of Ctnna-Citrine, *ctnna:ctnna-Citrine/+* embryos with or  
538 without the *hsp70l:zGrad-IRES-h2a-TagBFP* transgene were mounted in the 0.5% low-melt  
539 agarose/Ringer's solution with tricane, heat shocked around 31 hpf at 39.5 °C for 30 min in a  
540 water bath and imaged 35 min after the end of the heat shock every 20 min for 8 hours on a  
541 Leica SP8 confocal microscope equipped with HyD detectors (Leica Microsystems) using a 40x  
542 (NA 0.8) objective. The laser power was set to 31 µW for the 488 nm laser line. The pinhole was  
543 set to 106 µm. Imaged embryos were genotyped for *hsp70l:zGrad-IRES-h2a-TagBFP* by PCR.

544

545 To test the degradation of Sec-GFP by zGrad, *hsp70l:sec-GFP; hsp70:sec-mCherry* with and  
546 without the *hsp70l:zGrad-IRES-h2a-TagBFP* transgene were heat shocked around 24 hpf at  
547 39.5 °C for one hour in a water bath. Embryos were imaged at 30 hpf with a Leica 165M FC  
548 Fluorescent Stereo Microscope equipped with a Leica DFC345 FX camera. Imaged embryos  
549 were digested and genotyped for *hsp70l:zGrad-IRES-h2a-TagBFP* by PCR.

550

551 To observe the consequences of transient loss of Cxcr4b function, *cxcr4b:cxcr4b-EGFP-IRES-*  
552 *Kate2-CaaX-p7; cxcr4b -/-* embryos with and without the *hsp70l:zGrad-IRES-h2a-TagBFP*  
553 transgene were heat shocked at 31 hpf and 39.5 °C for one hour in a water bath and imaged 30  
554 min after the end of the heat shock every 20 min for 8 hours on a Leica SP8 confocal  
555 microscope equipped with HyD detectors (Leica Microsystems) using a 20x (NA 0.5) objective.  
556 The laser power was adjusted to 31 µW for the 488 nm laser line and to 73 µW for 594 nm laser  
557 line. The pinhole was set to 85 µm. Imaged embryos were genotyped for *hsp70l:zGrad-IRES-*  
558 *h2a-TagBFP* by PCR as described below.

559

### 560 **Analysis of the degradation kinetics after heat shock**

561 Quantification of signal intensity from heat shocked embryos was performed using a custom-  
562 written ImageJ macro (Data File 2). For H2A-EGFP/H2A-mCherry ratio imaging, a region  
563 encompassing the primordium and the somites (100 x 50 pixels, 75.76 µm x 37.88 µm) was  
564 manually selected. The macro script duplicates the red channel, applies a Gaussian Blur (sigma  
565 = 1) and generates a mask based on the mCherry intensities using Renyi Entropy Thresholding  
566 algorithm for the primordium and the imageJ Default Thresholding for the somites. Then, the  
567 macro applies the mask on the green and red channels to extract H2A-EGFP and H2A-mCherry  
568 signal intensities only from the masked region. Then, the macro sum-projects the green and red  
569 channels and extracts mean intensities of H2A-EGFP and H2A-mCherry for each time point.

570 Data from two independent imaging sessions were pooled for the analysis. Four embryos with  
571 *hsp70l:zGrad* transgene (two from each imaging session) and four embryos without  
572 *hsp70l:zGrad* transgene as control (two from each imaging session) were analyzed.

573 For Cdh1-sfGFP/Cdh1-TagRFP ratio imaging, first a region of 300 x 300 pixel (77.27µm x 77.27  
574 µm) at the center of the embryo was manually selected. The macro duplicates the red channel,  
575 applies a Gaussian Blur (sigma = 1) and generates a mask based on the TagRFP intensities  
576 using the imageJ Default Thresholding. Then, it applies the mask on the green and red

577 channels to extract Cdh1-sfGFP and Cdh1-mCherry signal intensities only from the masked  
578 region. Then, the macro sum-projects the green and red channels and extracts the mean  
579 intensities of the Cdh1-sfGFP and Cdh1-TagRFP fluorescences for each time point. Three  
580 embryos with carrying the *hsp70l:zGrad* transgene and four control embryos without the  
581 *hsp70l:zGrad* transgene were analyzed.

582 For Ctnna-Citrine fluorescence intensity approximation, a region of 300 x 300 pixel (85.23 x  
583 85.23  $\mu\text{m}$ ) at the center of the embryo was manually selected. The Z-stack comprising this  
584 region was maximum projected. The mean intensities of maximum-projected images were  
585 extracted over all time points. Four embryos with *hsp70l:zGrad* transgene and four embryos  
586 without *hsp70l:zGrad* transgene as control were analyzed.

587 For Cxcr4b-EGFP-to-Kate2-CaaX ratio imaging, the region of the primordium was manually  
588 selected and signal intensities were quantified using a custom-written ImageJ macro (Data File  
589 3). Briefly, the macro script duplicates the red channel, applies a Gaussian Blur (sigma = 2),  
590 maximum-projects the Z-stack, generates a mask based on the Kate2 intensities using the  
591 imageJ Default Thresholding, fills holes, erodes and dilates once (erosion and dilation reduces  
592 noise). Then, the macro sum-projects the green and red channels and applies the mask to the  
593 green and red channels to extract Cxcr4b-EGFP and Kate2-CaaX signal intensities only from  
594 the masked regions for each time point. Five embryos with *hsp70l:zGrad* transgene and five  
595 embryos without *hsp70l:zGrad* transgene as control were analyzed.

596

### 597 **Analysis of the circularity of the primordium**

598 To quantify the morphology of the primordium, we defined the extension of the primordium as  
599 the first 100  $\mu\text{m}$  from the tip of the primordium. Using Fiji, the primordium region was manually  
600 cropped in the red channel based on the Kate2-CaaX fluorescence intensities. Then, a median  
601 filter (6 pixels) was applied and the background was subtracted. Images were rendered binary  
602 using the Huang thresholding algorithm to obtain clear outlines of the primordium. Finally, we



603 quantified the circularity of the primordium for each time point using the “Analyze Particles”  
604 macro in Fiji. The circularity is defined as  $circularity = 4\pi(area/perimeter^2)$ .

605

### 606 **Cumulative migration distance and kymographs analysis**

607 To quantify the migration distance of the primordium over time, the “Manual Tracking” plugin in  
608 Fiji was used to track the tip of the primordium. Kymographs were drawn using the  
609 “KymoResliceWide” plugin in Fiji with a width of 5 pixel.

610

### 611 **Image acquisition and quantification of zGrad-mediated Cxcr4b-EGFP degradation with** 612 **zGrad expressed from the *cxcr4b* promoter**

613 *cxcr4b:cxcr4b-EGFP-IRES-Kate2-CaaX-p1* embryos and *cxcr4b:cxcr4b-EGFP-IRES-Kate2-*  
614 *CaaX-p1*; *cxcrb4:zGrad-IRES-h2a-TagBFP* embryos were sorted for the expression of the  
615 transgenesis marker (the *cxcr4b:cxcr4b-EGFP-IRES-Kate2-CaaX-p1* transgene expresses  
616 dsRed in the lens and the *cxcrb4:zGrad-IRES-h2a-TagBFP* transgene expresses mScarlet in  
617 the myocardium of the heart) at 29 hpf. Ten embryos of each genotype were mounted in 0.5 %  
618 low-melt agarose/Ringer’s solution with tricane on a slide. Embryos were imaged at 33 to 34 hpf  
619 using a Leica SP8 confocal microscope equipped with HyD detectors (Leica Microsystems)  
620 using a 40x (NA 1.1) objective. The laser power was calibrated to 27  $\mu$ W for the 488 nm laser  
621 line and 82  $\mu$ W for the 594 nm laser line. The pinhole was set to 77.17  $\mu$ m. To quantify the  
622 signal intensity ratio of EGFP/Kate2 in the primordium, the primordium was manually selected  
623 and fluorescent intensities for EGFP and Kate2 were extracted using the same custom-written  
624 ImageJ macro as described in the quantification of Cdh1-sfGFP degradation kinetics.

625

### 626 **Degradation of Ctnna-Citrine by zGrad mRNA injection**

627 1-2 nl of 50 ng/ $\mu$ l of *zGrad* mRNA or 50 ng/ $\mu$ l of *sfGFP* mRNA were injected in one-cell stage  
628 zygotic *ctnna:ctnna-Citrine*; *ctnna:ctnna-Citrine* and maternal zygotic *ctnna:ctnna-Citrine*;

629 *ctnna:ctnna-Citrine* embryos. Possible degradation of the mRNA in the injection mix was  
630 assessed by electrophoresis of the injection mix in the needle after injection of the embryos. For  
631 imaging, the embryos were mounted in 0.5% low-melt agarose/Ringer's solution on a slide.  
632 Images of injected embryos were obtained using an Axioplan Microscope (Zeiss) equipped with  
633 an Axiocam (Zeiss) and a 10x (NA 0.5) objective for Figure 3B and 4E and a 5x (NA 0.25)  
634 objective for Figure 3H. The number of dead and alive embryos was scored at 24 hpf.

635

### 636 **Genotyping of *cxcr4b*<sup>t26035</sup> and *hsp70l:zGrad-IRES-H2A-TagBFP***

637 To distinguish endogenous *cxcr4b* *-/+* and *cxcr4b* *-/-* from the *cxcr4b:cxcr4b-EGFP-IRES-kate2-*  
638 *CaaX* transgene in Figure 6 and Figure 6 – figure supplement 1, the following outer and nested  
639 primer pairs were used:

640 forward outer primer: GCAGACCTCCTGTTTGTCC

641 reverse outer primer: CTAAGTGCACACATACACACATT

642 forward nested primer: TCGAGCATGGGTACCATC

643 reverse nested primer: CTTAATCATCCATGTGGAAAAG

644 The reverse primers are designed to anneal to 3'UTR of the *cxcr4b* gene so that *cxcr4b-EGFP-*  
645 *IRES-Kate2-CaaX* transgene will not be amplified due to its large size. The PCR product was  
646 digested with the restriction enzyme HpyAV (NEB) to distinguish heterozygous and  
647 homozygous mutants.

648 To genotype *hsp70l:zGrad-IRES-H2A-TagBFP*, the region between *hsp70l* promoter and  
649 *fbxw11b* was amplified by PCR using the following outer and nested primer pairs:

650 forward outer primer: TGAGCATAATAACCATAAATACTA

651 reverse outer primer: ACCAGTTGGACTTGATCCATATGTCGACCACACCTCCAG

652 forward nested primer: AGCAAATGTCCTAAATGAAT

653 reverse nested primer: CAGAGGTGTTTCATCTGCTC.

654

655 **Whole-mount *in situ* hybridization**

656 The procedures for RNA probe synthesis and whole-mount *in situ* hybridization were done as  
657 previously described (50). The RNA probe against *cxcr4b* was previously described (38). The  
658 template for the synthesis of the *in situ* RNA probe against *vhhGFP4* was amplified from  
659 *pcDNA3-NSlmb-vhhGFP4* (Addgene plasmid #35579) using the following primer pair:

660 forward primer: ggccgtcgacATGATGAAAATGGAGACTGAC

661 reverse primer: TAATACGACTCACTATAGGGTTAGCTGGAGACGGTGACCTG

662 The RNA probe was synthesized using the Roche DIG labeling mix (Roche) and detected with  
663 an anti-DIG antibody coupled to alkaline phosphatase (1:5000, Roche) and NBT/BCIP stain  
664 (Roche). Embryos were mounted in the 3% Methyl cellulose (Sigma Aldrich). Images were  
665 collected on a Axioplan Microscope (Zeiss) equipped with an Axiocam (Zeiss) using a 10x (NA  
666 0.5) objective.

667

668 **Quantification of the primordium migration distance**

669 *cxcr4b:cxcr4b-EGFP-IRES-Kate2-CaaX-p1*; *cxcr4b* <sup>-/+</sup> fish were crossed to *cxcrb4:zGrad-IRES-*  
670 *h2a-TagBFP*; *cxcr4b* <sup>-/-</sup> fish and embryos were sorted based on the transgenesis markers  
671 (dsRed in lens for *cxcr4b:cxcr4b-EGFP-IRES-Kate2-CaaX-p1* and mScarlet in myocardium of  
672 heart for *cxcrb4:zGrad-IRES-h2a-TagBFP*) at 38 hpf and fixed in 4% PFA (Sigma Aldrich) in  
673 PBST overnight at room temperature. Whole-mount *in situ* hybridization against *cxcr4b* mRNA  
674 was performed as described above. Images for quantification of migration distance were taken  
675 in PBST on an Axioplan Microscope (Zeiss) equipped with an Axiocam (Zeiss) using a 10x (NA  
676 0.5) objective. Both sides of the embryo were imaged and counted as individual replicates.  
677 Images for Figure 6E were taken by mounting embryos in 3% Methyl cellulose. *cxcr4b* mutant  
678 embryos were genotyped by PCR after image acquisition. The migrating distance of the  
679 primordium was quantified manually using ImageJ.

680

681 **Conditional Cdh1 loss-of-protein function through zGrad expression from a heat shock**  
682 **promoter**

683 The number of embryos from *cdh1:cdh1-sfGFP; cdh1 +/-* with or without *hsp70l:zGrad* females  
684 crossed with *cdh1 +/-* males was counted at 5 hpf. The dead embryos were removed at 24 hpf  
685 and embryos were sorted by Cdh1-sfGFP expression. At 25 hpf, embryos were heat shocked at  
686 39.5 °C for one hour in a water bath. The embryos were mounted in 0.5% low-melt  
687 agarose/Ringer's solution on a slide. Images of embryos were recorded with an Axioplan  
688 Microscope (Zeiss) equipped with an Axiocam (Zeiss) and a 5x (NA 0.25) objective (panels B  
689 and C in Figure 4) and a 10x (NA 0.5) objective (panels D and E in Figure 4). The number of  
690 embryos with and without skin defects and lethality was scored at 32 hpf.

691

692 **DASPEI staining and neuromast position quantification**

693 The location of neuromasts was assessed by staining 4 dpf live embryos with 25 ug/mL DASPEI  
694 (2-(4-(dimethylamino)styryl)-N-Ethylpyridinium Iodide, Invitrogen). Images were collected on  
695 Leica 165M FC Fluorescent Stereo Microscope equipped with a Leica DFC345 FX camera. The  
696 location of the last neuromast on the trunk was quantified as ratio between the length from the  
697 head to the last neuromast on the trunk divided by the length of the whole embryo (see Figure 6  
698 – figure supplement 1B, C).

699

700 **Statistical analysis**

701 Statistical tests were performed using R and R-studio software. To compare two sample sets,  
702 first each sample set was tested using the Kolmogorov-Smirnov test to determine whether the  
703 sample set was normally distributed. Then, we tested whether the sample sets had the same  
704 standard deviation using the F-test. Based on the result of F-test, the two sample sets were  
705 compared by either the Welch's t-test or the Student's t-test (Figure 1D, Figure 1 – figure  
706 supplements 2B, 3C, 6D, 6F, Figure 6 – figure supplement 6C). To analyze the fold-change

707 curves in Figure 2C, 2E, 2H, 2K, the curves were fitted to a one-exponential decay model ( $Y =$   
708  $\text{Span} \cdot \exp(-k \cdot X) + \text{Plateau}$ ) using Prism 7 (Graphpad). The values of T1/2 and the plateau, which  
709 we assumed to be the value of maximal degradation, were extracted from the fitted curves. In  
710 Figure 5D (inset, 30 min to 240 min), two data sets were compared by paired-t test using Prism.

711

712

### 713 **Acknowledgements**

714 We thank S. Lau for critical comments; D. Kane, L. Trinh and S. Fraser for reagents, T. Gerson  
715 for excellent fish care and Dorus Gadella (Addgene plasmid # 85042), Markus Affolter (Addgene  
716 plasmid # 35579) and Masato Kanemaki (Addgene plasmid # 72835) for plasmids. This work  
717 was supported by NIH grants HD088779 (H.K.) and NS102322 (H.K.).

718

719

### 720 **Competing interests**

721 The authors declare no competing interest.

722

723 **References**

724

- 725 1. Housden BE, Muhar M, Gemberling M, Gersbach CA, Stainier DY, Seydoux G, et al.  
726 Loss-of-function genetic tools for animal models: cross-species and cross-platform differences.  
727 *Nat Rev Genet.* 2017;18(1):24-40.
- 728 2. Natsume T, Kanemaki MT. Conditional Degrons for Controlling Protein Expression at the  
729 Protein Level. *Annu Rev Genet.* 2017;51:83-102.
- 730 3. Bonger KM, Rakhit R, Payumo AY, Chen JK, Wandless TJ. General method for  
731 regulating protein stability with light. *ACS Chem Biol.* 2014;9(1):111-5.
- 732 4. Shin YJ, Park SK, Jung YJ, Kim YN, Kim KS, Park OK, et al. Nanobody-targeted E3-  
733 ubiquitin ligase complex degrades nuclear proteins. *Sci Rep.* 2015;5:14269.
- 734 5. Daniel K, Icha J, Horenburg C, Muller D, Norden C, Mansfeld J. Conditional control of  
735 fluorescent protein degradation by an auxin-dependent nanobody. *Nat Commun.*  
736 2018;9(1):3297.
- 737 6. Neklesa TK, Tae HS, Schneekloth AR, Stulberg MJ, Corson TW, Sundberg TB, et al.  
738 Small-molecule hydrophobic tagging-induced degradation of HaloTag fusion proteins. *Nat Chem*  
739 *Biol.* 2011;7(8):538-43.
- 740 7. Caussin E, Kanca O, Affolter M. Fluorescent fusion protein knockout mediated by anti-  
741 GFP nanobody. *Nat Struct Mol Biol.* 2011;19(1):117-21.
- 742 8. Wang S, Tang NH, Lara-Gonzalez P, Zhao Z, Cheerambathur DK, Prevo B, et al. A  
743 toolkit for GFP-mediated tissue-specific protein degradation in *C. elegans*. *Development.*  
744 2017;144(14):2694-701.
- 745 9. Brauchle M, Hansen S, Caussin E, Lenard A, Ochoa-Espinosa A, Scholz O, et al.  
746 Protein interference applications in cellular and developmental biology using DARPins that  
747 recognize GFP and mCherry. *Biol Open.* 2014;3(12):1252-61.

- 748 10. Natsume T, Kiyomitsu T, Saga Y, Kanemaki MT. Rapid Protein Depletion in Human  
749 Cells by Auxin-Inducible Degron Tagging with Short Homology Donors. *Cell Rep.*  
750 2016;15(1):210-8.
- 751 11. Nishimura K, Fukagawa T, Takisawa H, Kakimoto T, Kanemaki M. An auxin-based  
752 degron system for the rapid depletion of proteins in nonplant cells. *Nat Methods.*  
753 2009;6(12):917-22.
- 754 12. Holland AJ, Fachinetti D, Han JS, Cleveland DW. Inducible, reversible system for the  
755 rapid and complete degradation of proteins in mammalian cells. *Proc Natl Acad Sci U S A.*  
756 2012;109(49):E3350-7.
- 757 13. Armenti ST, Lohmer LL, Sherwood DR, Nance J. Repurposing an endogenous  
758 degradation system for rapid and targeted depletion of *C. elegans* proteins. *Development.*  
759 2014;141(23):4640-7.
- 760 14. Chong SW, Emelyanov A, Gong Z, Korzh V. Expression pattern of two zebrafish genes,  
761 *cxcr4a* and *cxcr4b*. *Mech Dev.* 2001;109(2):347-54.
- 762 15. Trinh le A, Hochgreb T, Graham M, Wu D, Ruf-Zamojski F, Jayasena CS, et al. A  
763 versatile gene trap to visualize and interrogate the function of the vertebrate proteome. *Genes*  
764 *Dev.* 2011;25(21):2306-20.
- 765 16. Zigman M, Trinh le A, Fraser SE, Moens CB. Zebrafish neural tube morphogenesis  
766 requires Scribble-dependent oriented cell divisions. *Curr Biol.* 2011;21(1):79-86.
- 767 17. Kofron M, Spagnuolo A, Klymkowsky M, Wylie C, Heasman J. The roles of maternal  
768 alpha-catenin and plakoglobin in the early *Xenopus* embryo. *Development.* 1997;124(8):1553-  
769 60.
- 770 18. Han MK, Hoijman E, Noel E, Garric L, Bakkers J, de Rooij J. alphaE-catenin-dependent  
771 mechanotransduction is essential for proper convergent extension in zebrafish. *Biol Open.*  
772 2016;5(10):1461-72.

- 773 19. Yoshida-Noro C, Suzuki N, Takeichi M. Molecular nature of the calcium-dependent cell-  
774 cell adhesion system in mouse teratocarcinoma and embryonic cells studied with a monoclonal  
775 antibody. *Dev Biol.* 1984;101(1):19-27.
- 776 20. Stephenson RO, Yamanaka Y, Rossant J. Disorganized epithelial polarity and excess  
777 trophectoderm cell fate in preimplantation embryos lacking E-cadherin. *Development.*  
778 2010;137(20):3383-91.
- 779 21. Larue L, Ohsugi M, Hirchenhain J, Kemler R. E-cadherin null mutant embryos fail to form  
780 a trophectoderm epithelium. *Proc Natl Acad Sci U S A.* 1994;91(17):8263-7.
- 781 22. Kane DA, Hammerschmidt M, Mullins MC, Maischein HM, Brand M, van Eeden FJ, et al.  
782 The zebrafish epiboly mutants. *Development.* 1996;123:47-55.
- 783 23. Kane DA, McFarland KN, Warga RM. Mutations in half baked/E-cadherin block cell  
784 behaviors that are necessary for teleost epiboly. *Development.* 2005;132(5):1105-16.
- 785 24. Montero JA, Carvalho L, Wilsch-Brauninger M, Kilian B, Mustafa C, Heisenberg CP.  
786 Shield formation at the onset of zebrafish gastrulation. *Development.* 2005;132(6):1187-98.
- 787 25. Haas P, Gilmour D. Chemokine signaling mediates self-organizing tissue migration in  
788 the zebrafish lateral line. *Dev Cell.* 2006;10(5):673-80.
- 789 26. David NB, Sapede D, Saint-Etienne L, Thisse C, Thisse B, Dambly-Chaudiere C, et al.  
790 Molecular basis of cell migration in the fish lateral line: role of the chemokine receptor CXCR4  
791 and of its ligand, SDF1. *Proc Natl Acad Sci U S A.* 2002;99(25):16297-302.
- 792 27. Venkiteswaran G, Lewellis SW, Wang J, Reynolds E, Nicholson C, Knaut H. Generation  
793 and dynamics of an endogenous, self-generated signaling gradient across a migrating tissue.  
794 *Cell.* 2013;155(3):674-87.
- 795 28. Lewellis SW, Nagelberg D, Subedi A, Staton A, LeBlanc M, Giraldez A, et al. Precise  
796 SDF1-mediated cell guidance is achieved through ligand clearance and microRNA-mediated  
797 decay. *J Cell Biol.* 2013;200(3):337-55.



- 798 29. Fuentes F, Reynolds E, Lewellis SW, Venkiteswaran G, Knaut H. A Plasmid Set for  
799 Efficient Bacterial Artificial Chromosome (BAC) Transgenesis in Zebrafish. *G3 (Bethesda)*.  
800 2016;6(4):829-34.
- 801 30. Clift D, McEwan WA, Labzin LI, Konieczny V, Mogessie B, James LC, et al. A Method  
802 for the Acute and Rapid Degradation of Endogenous Proteins. *Cell*. 2017;171(7):1692-706 e18.
- 803 31. Ciruna B, Weidinger G, Knaut H, Thisse B, Thisse C, Raz E, et al. Production of  
804 maternal-zygotic mutant zebrafish by germ-line replacement. *Proc Natl Acad Sci U S A*.  
805 2002;99(23):14919-24.
- 806 32. Scheer N, Campos-Ortega JA. Use of the Gal4-UAS technique for targeted gene  
807 expression in the zebrafish. *Mech Dev*. 1999;80(2):153-8.
- 808 33. Campbell LJ, Willoughby JJ, Jensen AM. Two types of Tet-On transgenic lines for  
809 doxycycline-inducible gene expression in zebrafish rod photoreceptors and a gateway-based  
810 tet-on toolkit. *PLoS One*. 2012;7(12):e51270.
- 811 34. Kawakami K, Abe G, Asada T, Asakawa K, Fukuda R, Ito A, et al. zTrap: zebrafish gene  
812 trap and enhancer trap database. *BMC Dev Biol*. 2010;10:105.
- 813 35. Hoshijima K, Jurynek MJ, Grunwald DJ. Precise Editing of the Zebrafish Genome Made  
814 Simple and Efficient. *Dev Cell*. 2016;36(6):654-67.
- 815 36. Rossi A, Kontarakis Z, Gerri C, Nolte H, Holper S, Kruger M, et al. Genetic  
816 compensation induced by deleterious mutations but not gene knockdowns. *Nature*.  
817 2015;524(7564):230-3.
- 818 37. Kimmel CB, Ballard WW, Kimmel SR, Ullmann B, Schilling TF. Stages of embryonic  
819 development of the zebrafish. *Dev Dyn*. 1995;203(3):253-310.
- 820 38. Knaut H, Werz C, Geisler R, Nusslein-Volhard C, Tübingen Screen C. A zebrafish  
821 homologue of the chemokine receptor Cxcr4 is a germ-cell guidance receptor. *Nature*.  
822 2003;421(6920):279-82.

- 823 39. Wang J, Yin Y, Lau S, Sankaran J, Rothenberg E, Wohland T, et al. Anosmin1 Shuttles  
824 Fgf to Facilitate Its Diffusion, Increase Its Local Concentration, and Induce Sensory Organs.  
825 *Dev Cell.* 2018;46(6):751-66 e12.
- 826 40. Kozlovskaja-Gumbriene A, Yi R, Alexander R, Aman A, Jiskra R, Nagelberg D, et al.  
827 Proliferation-independent regulation of organ size by Fgf/Notch signaling. *Elife.* 2017;6.
- 828 41. Kwan KM, Fujimoto E, Grabher C, Mangum BD, Hardy ME, Campbell DS, et al. The  
829 Tol2kit: a multisite gateway-based construction kit for Tol2 transposon transgenesis constructs.  
830 *Dev Dyn.* 2007;236(11):3088-99.
- 831 42. Gibson DG, Young L, Chuang RY, Venter JC, Hutchison CA, 3rd, Smith HO. Enzymatic  
832 assembly of DNA molecules up to several hundred kilobases. *Nat Methods.* 2009;6(5):343-5.
- 833 43. Halloran MC, Sato-Maeda M, Warren JT, Su F, Lele Z, Krone PH, et al. Laser-induced  
834 gene expression in specific cells of transgenic zebrafish. *Development.* 2000;127(9):1953-60.
- 835 44. Suster ML, Abe G, Schouw A, Kawakami K. Transposon-mediated BAC transgenesis in  
836 zebrafish. *Nat Protoc.* 2011;6(12):1998-2021.
- 837 45. Huang CJ, Tu CT, Hsiao CD, Hsieh FJ, Tsai HJ. Germ-line transmission of a  
838 myocardium-specific GFP transgene reveals critical regulatory elements in the cardiac myosin  
839 light chain 2 promoter of zebrafish. *Dev Dyn.* 2003;228(1):30-40.
- 840 46. Warming S, Costantino N, Court DL, Jenkins NA, Copeland NG. Simple and highly  
841 efficient BAC recombineering using galk selection. *Nucleic Acids Res.* 2005;33(4):e36.
- 842 47. Bindels DS, Haarbosch L, van Weeren L, Postma M, Wiese KE, Mastop M, et al.  
843 mScarlet: a bright monomeric red fluorescent protein for cellular imaging. *Nat Methods.*  
844 2017;14(1):53-6.
- 845 48. Morawska M, Ulrich HD. An expanded tool kit for the auxin-inducible degron system in  
846 budding yeast. *Yeast.* 2013;30(9):341-51.

- 847 49. Zhang L, Ward JD, Cheng Z, Dernburg AF. The auxin-inducible degradation (AID)  
848 system enables versatile conditional protein depletion in *C. elegans*. *Development*.  
849 2015;142(24):4374-84.
- 850 50. Thisse C, Thisse B. High-resolution in situ hybridization to whole-mount zebrafish  
851 embryos. *Nat Protoc*. 2008;3(1):59-69.
- 852
- 853

854 **Figures and Figure legends**

855

856

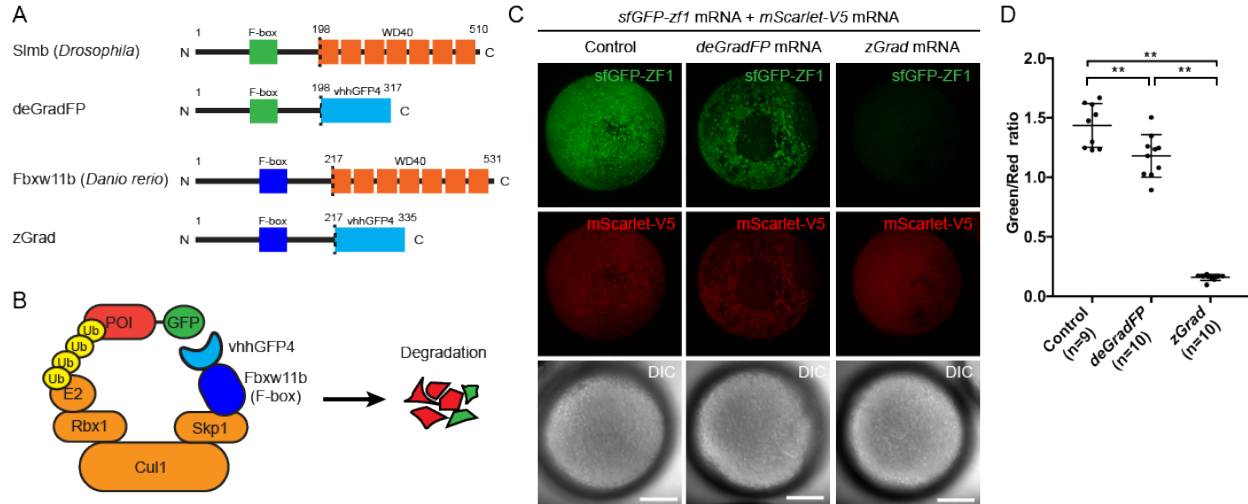

857

858

859 **Figure 1: zGrad degrades GFP-tagged proteins in zebrafish**

860 (A) Comparison of deGradFP and zGrad fusion proteins.

861 (B) Schematic of zGrad-mediated target protein degradation. POI: protein of interest.

862 (C) Representative images of embryos injected with sfGFP-ZF1 mRNA and mScarlet-V5 mRNA  
863 (left column) or with sfGFP-ZF1 mRNA and mScarlet-V5 mRNA and deGradFP mRNA (middle  
864 column) or zGrad mRNA (right column). Note that mScarlet-V5 fluorescence served as an  
865 internal control. Scale bar: 200  $\mu$ m. \*\*  $p < 0.01$ .

866 (D) Quantification of control, deGradFP-mediated and zGrad-mediated sfGFP-ZF1 degradation  
867 shown in C.

868

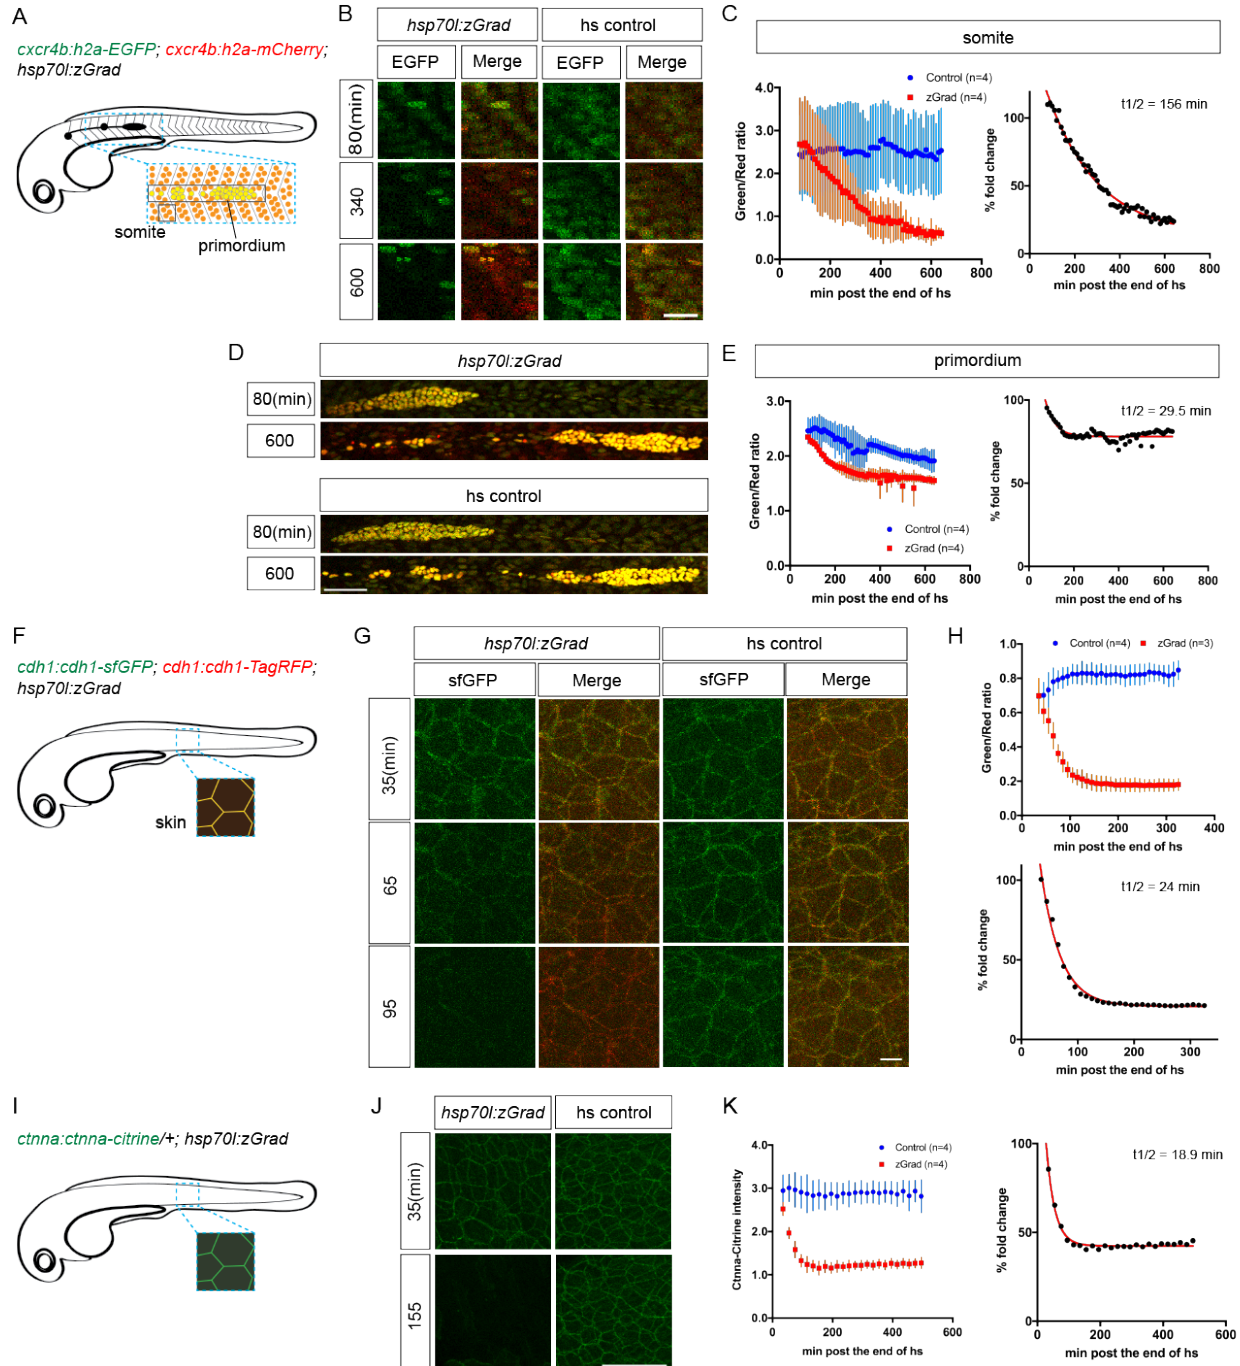

869

870

871 **Figure 2: zGrad degrades nuclear, transmembrane and cytoplasmic proteins**

872 (A) Schematic of strategy to assess zGrad-mediated H2A-EGFP degradation in the somites and

873 the primordium.

874 (B) Maximum-projected confocal images of somatic nuclei in heat-shocked *cxcr4b:H2A-EGFP*;  
875 *cxcr4b:H2A-mCherry* embryos transgenic for *hsp70l:zGrad* (left) or not (right) at indicated time  
876 in min after the end of heat shock (29-30 hpf). Scale bar: 20  $\mu$ m.

877 (C) Left, quantification of H2A-EGFP-to-H2A-mCherry ratios in the somites of control (blue) and  
878 zGrad-expressing embryos (red) after the end of heat shock in min. Mean and SD are indicated.  
879 Right, H2A-EGFP-to-H2A-mCherry ratio of zGrad-expressing embryos normalized to control  
880 embryos (black dots) and fitted to a one-exponential decay model (red).

881 (D) Maximum-projected confocal images of primordium nuclei in heat-shocked *cxcr4b:H2A-*  
882 *EGFP*; *cxcr4b:H2A-mCherry* embryos transgenic for *hsp70l:zGrad* (top) or not (bottom) at  
883 indicated time in min after the end of heat shock (29-30 hpf). Scale bar: 50  $\mu$ m.

884 (E) Left, quantification of H2A-EGFP-to-H2A-mCherry ratios in the primordia of control (blue)  
885 and zGrad-expressing embryos (red) after the end of heat shock in min. Mean and SD are  
886 indicated. Right, H2A-EGFP-to-H2A-mCherry ratio of zGrad-expressing embryos normalized to  
887 control embryos (black dots) and fit to a one-exponential decay model (red).

888 (F) Schematic of strategy to assess zGrad-mediated Cdh1-sfGFP degradation in the skin  
889 (enveloping and epidermal basal layer).

890 (G) Maximum-projected confocal images of the skin in heat-shocked *cdh1:cdh1-sfGFP*;  
891 *cdh1:cdh1-TagRFP* embryos transgenic for *hsp70l:zGrad* (left) or not (right) at indicated time in  
892 min after the end of heat shock (31 hpf). Scale bar: 10  $\mu$ m.

893 (H) Top, quantification of Cdh1-sfGFP-to-Cdh1-TagRFP ratios in the primordia of control (blue)  
894 and zGrad-expressing embryos (red) after the end of heat shock in min. Mean and SD are  
895 indicated. Bottom, Cdh1-sfGFP-to-Cdh1-TagRFP ratio of zGrad-expressing embryos  
896 normalized to control embryos (black dots) and fit to a one-exponential decay model (red).

897 (I) Schematic of strategy to assess zGrad-mediated Ctnna-Citrine degradation in the skin.

898 (J) Maximum-projected confocal images of skin cells in heat-shocked *ctnna:ctnna-Citrine*  
899 embryos transgenic for *hsp70l:zGrad* (left) or non-*hsp70l:zGrad* transgenic controls (right) at  
900 indicated time in min past the end of heat shock (31 hpf). Scale bar: 50  $\mu$ m.  
901 (K) Left, quantification of Ctnna-Citrine levels in the skin of control (blue) and zGrad-expressing  
902 embryos (red) after the end of heat shock in min. Mean and SD are indicated. Right, Ctnna-  
903 Citrine levels in zGrad-expressing embryos normalized to Ctnna-Citrine levels in control  
904 embryos (black dots) and fit to a one-exponential decay model (red).  
905

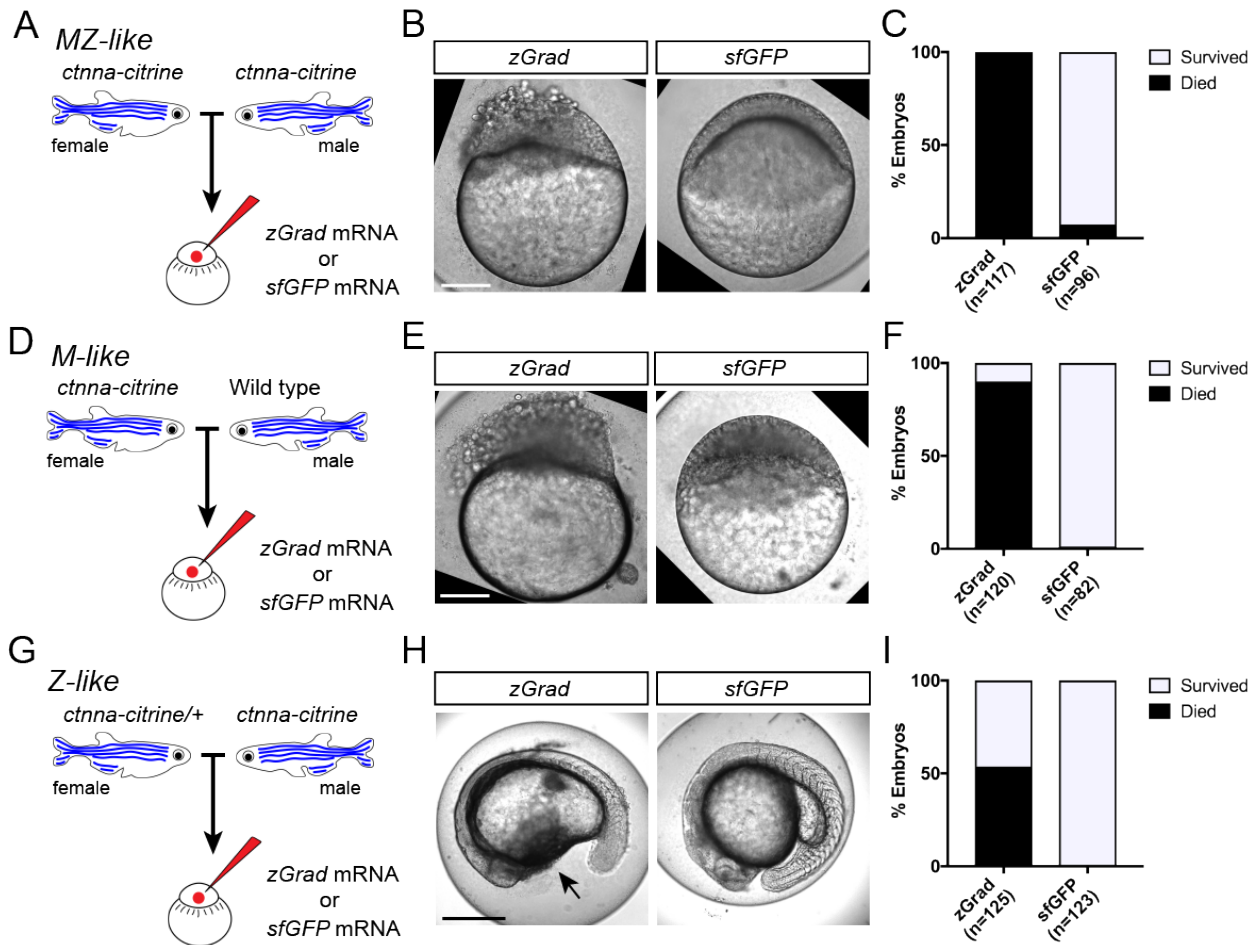

906

907

908 **Figure 3: zGrad-mediated depletion of alpha-Catenin results in cell adhesion defects**

909 (A) Breeding strategy to assess zGrad-mediated degradation of maternally and zygotically  
910 provided Ctnna-Citrine on embryonic development.

911 (B) Images of MZ *cttna:cttna-Citrine* embryos injected with *zGrad* mRNA or *sfGFP* mRNA.  
912 Scale bar: 100  $\mu$ m.

913 (C) Quantification of MZ *cttna:cttna-Citrine* embryos injected with *zGrad* mRNA or *sfGFP*  
914 mRNA that disintegrated and died.

915 (D) Breeding strategy to assess zGrad-mediated degradation of maternally provided Ctnna-  
916 Citrine on embryonic development.



917 (E) Images of *M cttna:cttna-Citrine* embryos injected with *zGrad* mRNA or *sfGFP* mRNA. Scale  
918 bar: 100  $\mu$ m.

919 (F) Quantification of *M cttna:cttna-Citrine* embryos injected with *zGrad* mRNA or *sfGFP* mRNA  
920 that disintegrated and died.

921 (G) Breeding strategy to assess *zGrad*-mediated degradation of zygotically provided *Ctnna-*  
922 *Citrine* on embryonic development.

923 (H) Images of *Z cttna:cttna-Citrine* embryos injected with *zGrad* mRNA or *sfGFP* mRNA. Scale  
924 bar: 100  $\mu$ m.

925 (I) Quantification of *Z cttna:cttna-Citrine* embryos injected with *zGrad* mRNA or *sfGFP* mRNA  
926 that displayed tissue rupture (arrow) and died.

927

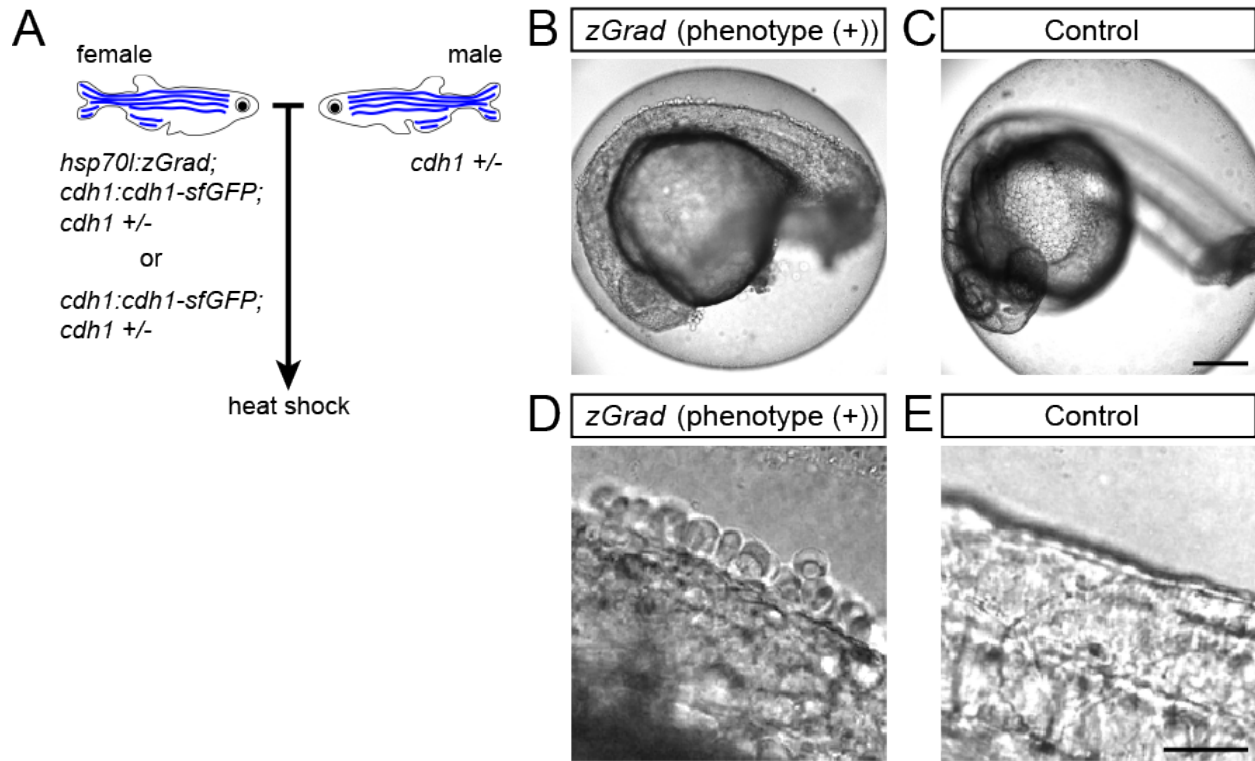

928

929

930 **Figure 4: zGrad-mediated depletion of Cadherin-1 at 25 hpf results in skin defects and**  
931 **lethality**

932 (A) Breeding strategy to assess heat shock-induced zGrad degradation of Cdh1-sfGFP on  
933 embryonic development.

934 (B, C) Images of *cdh1:cdh1-sfGFP* embryo with skin defects (B) and control embryo (C) at 29  
935 hpf. Embryos were heat shocked at 25 hpf for one hour. Scale bar: 200  $\mu$ m.

936 (D, E) Images of the dorsal trunk of *cdh1:cdh1-sfGFP* embryo with skin cells detaching (D) and  
937 control embryo (E) at 29 hpf. Embryos were heat shocked at 25 hpf for one hour. Scale bar: 50  
938  $\mu$ m.

939

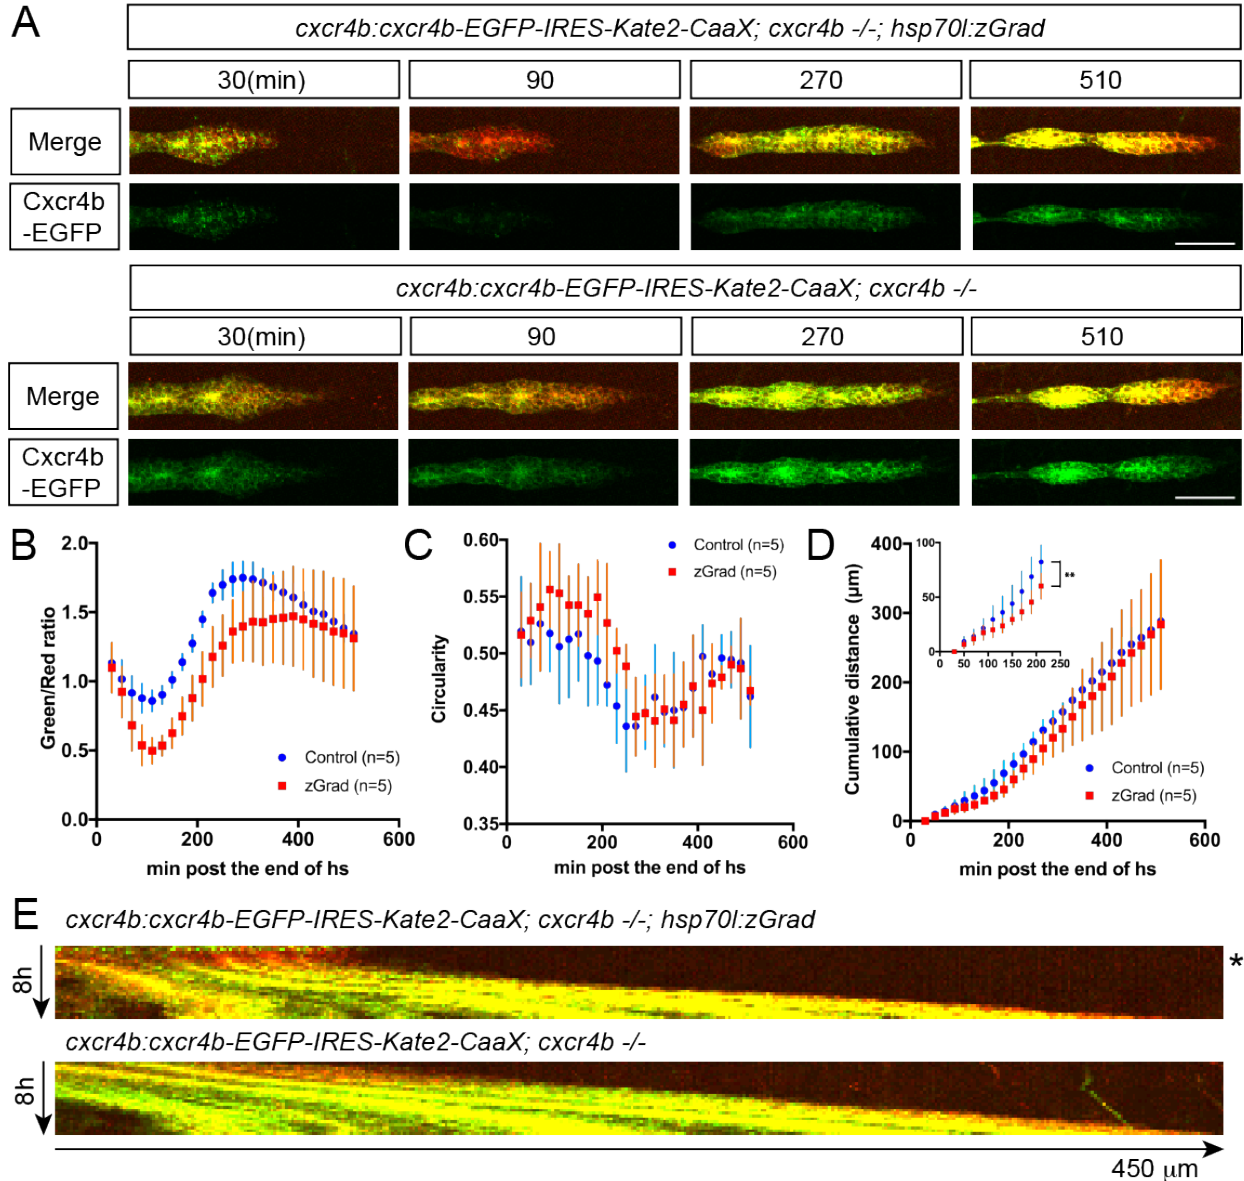

940

941

942 **Figure 5: A pulse of zGrad degrades Cxcr4b-GFP and stalls primordium migration**

943 **transiently**

944 (A) Maximum-projected confocal images of the primordia in heat-shocked *cxcr4b:cxcr4b-EGFP-*

945 *IRES-Kate2-CaaX-p7; cxcr4b-/-* embryos transgenic for *hsp70l:zGrad* (upper panels) or not

946 (lower panels) at indicated time in min after the end of heat shock (31 hpf). Scale bar: 50 µm.

947 (B) Quantification of Cxcr4b-EGFP-to-Kate2-CaaX ratios in the primordia of control (blue) and  
948 zGrad-expressing embryos (red) after the end of heat shock in min. Mean and SD are indicated.  
949 (C) Quantification of circularity of the primordia of control (blue) and zGrad-expressing embryos  
950 (red) after the end of heat shock in min. Mean and SD are indicated.  
951 (D) Quantification of the cumulative primordium migration distance in control (blue) and zGrad-  
952 expressing embryos (red) after the end of heat shock in min. Mean and SD are indicated. Inset  
953 shows magnification of the 30 min to 240 min time interval. \*\* =  $p < 0.01$ .  
954 (E) Kymograph of the primordia in heat-shocked *cxcr4b:cxcr4b-EGFP-IRES-Kate2-CaaX-p7*;  
955 *cxcr4b*<sup>-/-</sup> embryos transgenic for *hsp70l:zGrad* (top) or not (bottom). Cxcr4b-EGFP is shown in  
956 green and Kate2-CaaX in red. Asterisk indicates the time interval in which Cxcr4b-EGFP is  
957 transiently degraded and the primordium transiently ceases to migrate.  
958

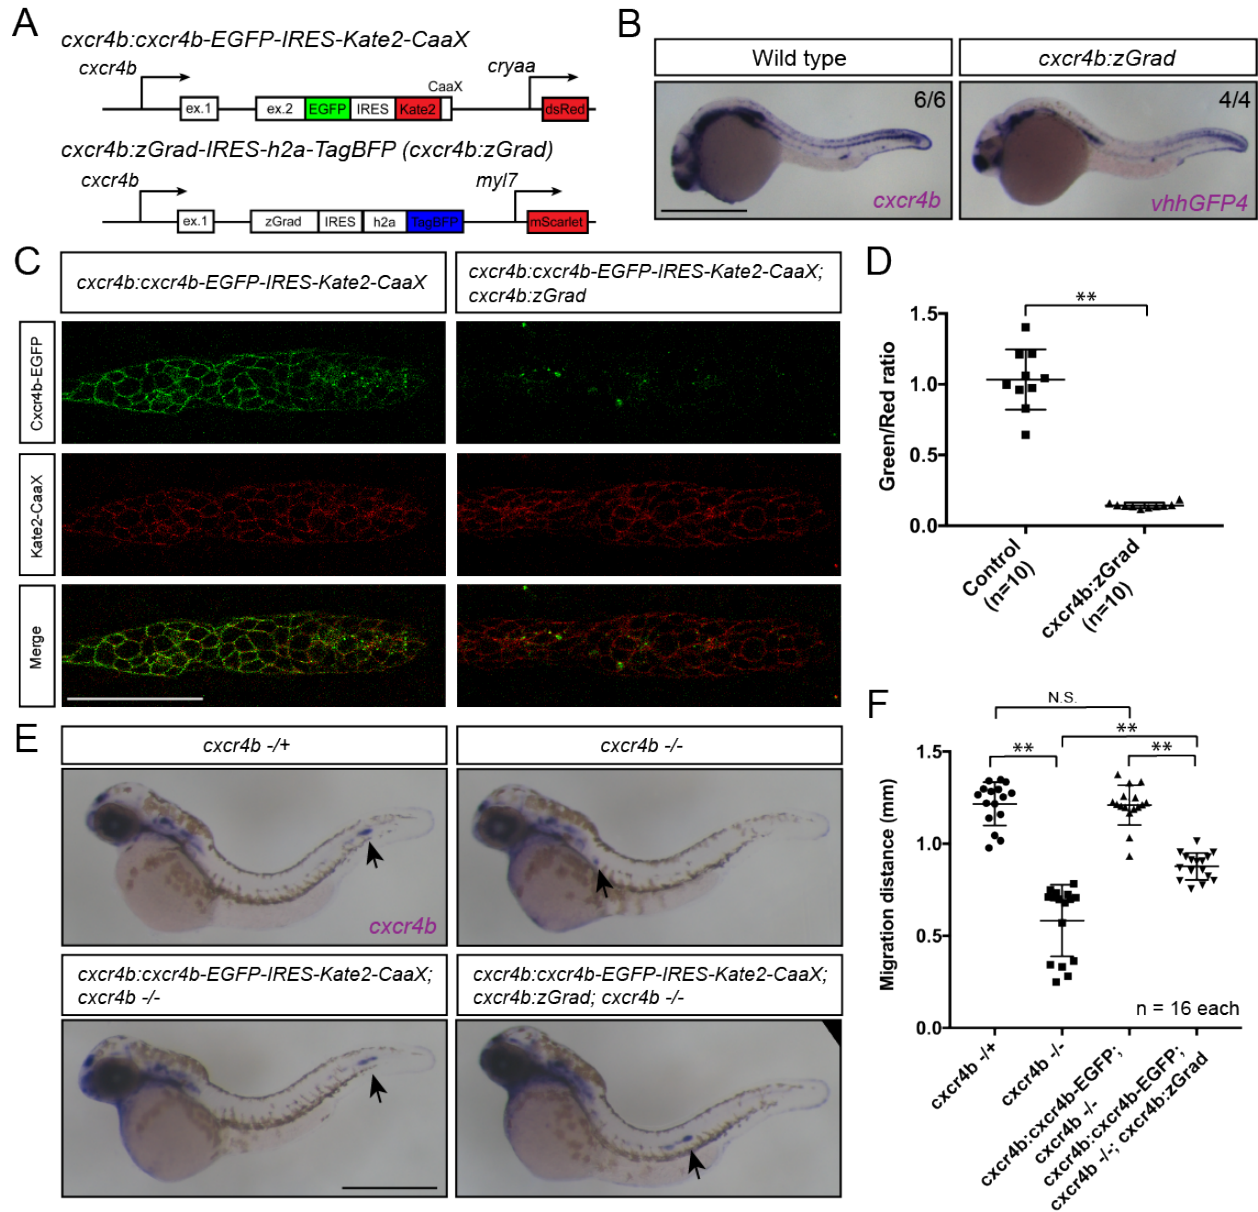

959

960

961 **Figure 6: Tissue-specific expression of zGrad in the primordium degrades Cxcr4b-EGFP**

962 **and slows down primordium migration**

963 (A) Schematic of strategy to assess zGrad-mediated Cxcr4b-EGFP degradation in the

964 primordium on primordium migration.

965 (B) *In situ* hybridization against *cxcr4b* mRNA in a wildtype embryo and against *zGrad* mRNA in

966 a *cxcr4b:zGrad* embryo at 24hpf. Scale bar: 0.5 mm.

967 (C) Single-plane confocal images of the primordium in *cxcr4b:cxcr4b-EGFP-IRES-Kate2-CaaX-*  
968 *p1* control (left) and *cxcr4b:cxcr4b-EGFP-IRES-Kate2-CaaX-p1; cxcr4b:zGrad* embryos (right)  
969 at 36 hpf. Note that the embryos are *cxcr4b +/-* or *cxcr4b -/-*. Scale bar: 50  $\mu$ m.

970 (D) Quantification of Cxcr4b-EGFP to Kate2-CaaX fluorescence intensity ratio in the primordia  
971 of control embryos (blue) and embryos expressing zGrad in the primordium at 36 hpf. Mean and  
972 SD are indicated. \*\* =  $p < 0.01$ .

973 (E) *In situ* hybridization against *cxcr4b* mRNA in *cxcr4b-/+* (top left), *cxcr4b-/-* (top right),  
974 *cxcr4b:cxcr4b-EGFP-IRES-Kate2-CaaX-p1; cxcr4b-/-* (bottom left) and *cxcr4b:cxcr4b-EGFP-*  
975 *IRES-Kate2-CaaX-p1; cxcr4b-/-; cxcr4b:zGrad* embryos (bottom right) at 38 hpf. Arrows indicate  
976 the location of the primordium. Scale bar: 0.5 mm.

977 (F) Quantification of primordia migration distance of the indicated genotypes at 38 hpf. Mean,  
978 SD and n are indicated. \*\* =  $p < 0.01$ , N.S. =  $p > 0.05$ .

979

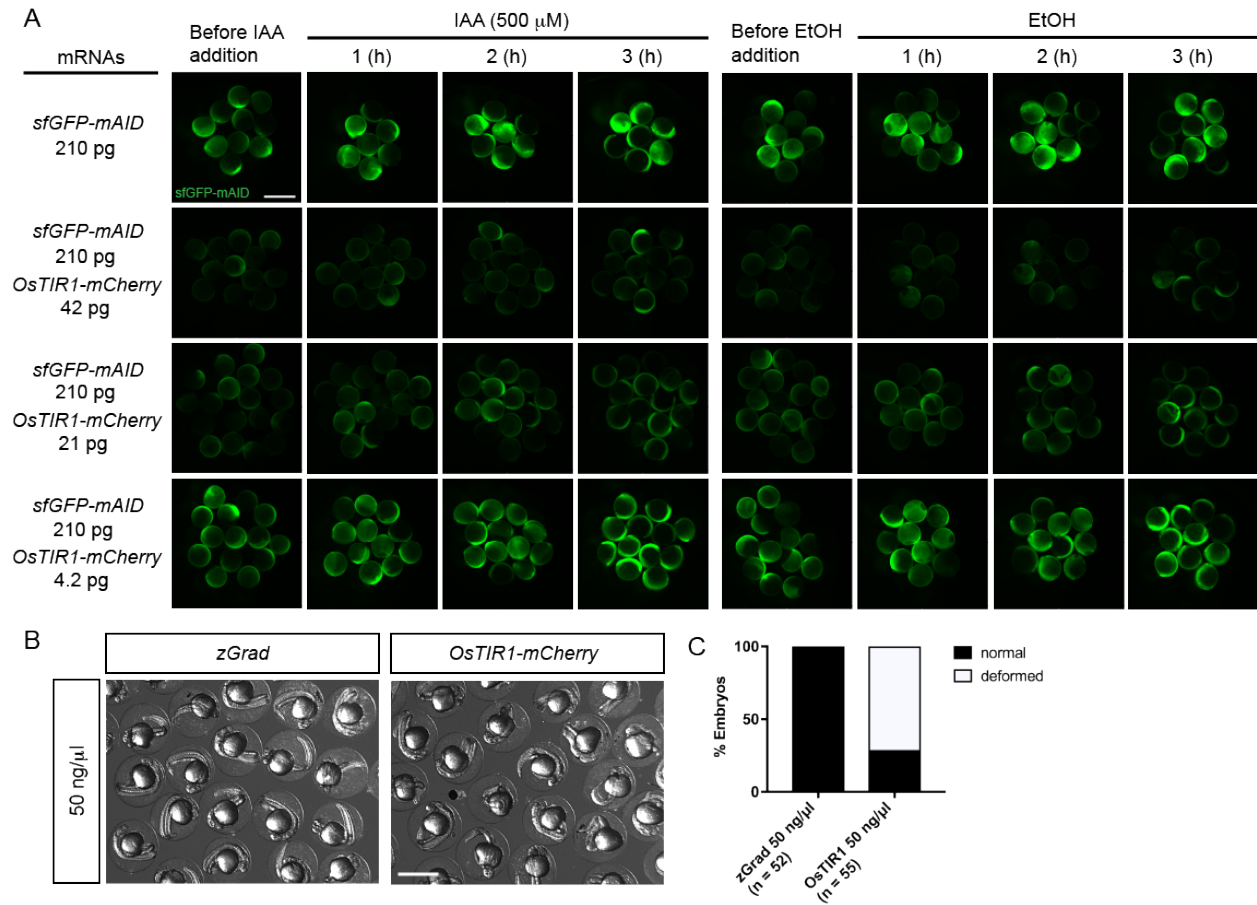

980

981

982 **Figure 1 – figure supplements 1: Characterization of the AID system in zebrafish**

983 (A) Images of embryos injected with *sfGFP-mAID* mRNA and different amounts of *OsTIR1-*

984 *mCherry* mRNA and incubated with the auxin IAA (left) or 0.2%EtOH (right) over a 3 hour time

985 course. Scale bar: 1 mm.

986 (B) Images of embryos injected with *zGrad* mRNA and *OsTIR1-mCherry* mRNA at 24 hpf. Scale

987 bar: 1 mm.

988 (C) Percentage of deformed embryos among embryos injected with *zGrad* mRNA and *OsTIR1-*

989 *mCherry* mRNA at 24 hpf.

990

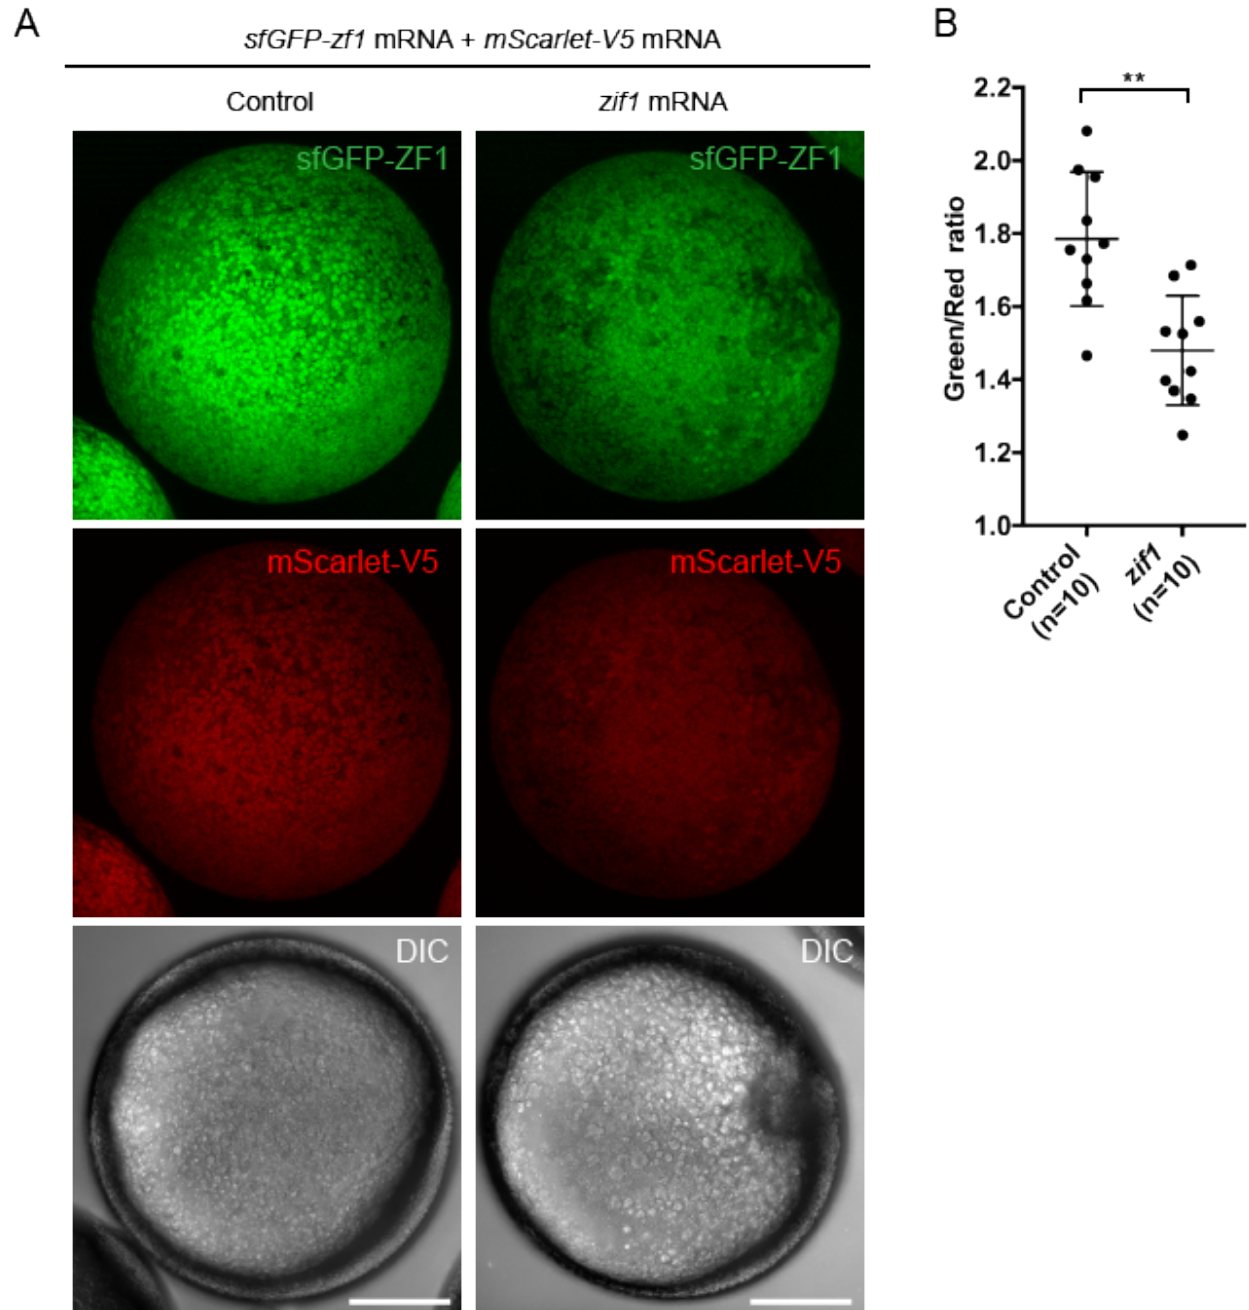

991

992

993 **Figure 1 – figure supplements 2: Characterization of the ZIF1 system in zebrafish**

994 (A) Images of embryos injected with *sfGFP-zf1* mRNA and *mScarlet-V5* mRNA (left) and

995 embryos injected with *sfGFP-zf1* mRNA, *mScarlet-V5* mRNA and *zf1* mRNA (right) at 6 hpf.

996 Scale bar: 200  $\mu$ m.



997 (B) Quantification of the sfGFP-to-mScarlet fluorescence intensity ratio in the embryos shown in

998 A. Mean, SD and n are indicated. \*\* =  $p < 0.01$ .

999

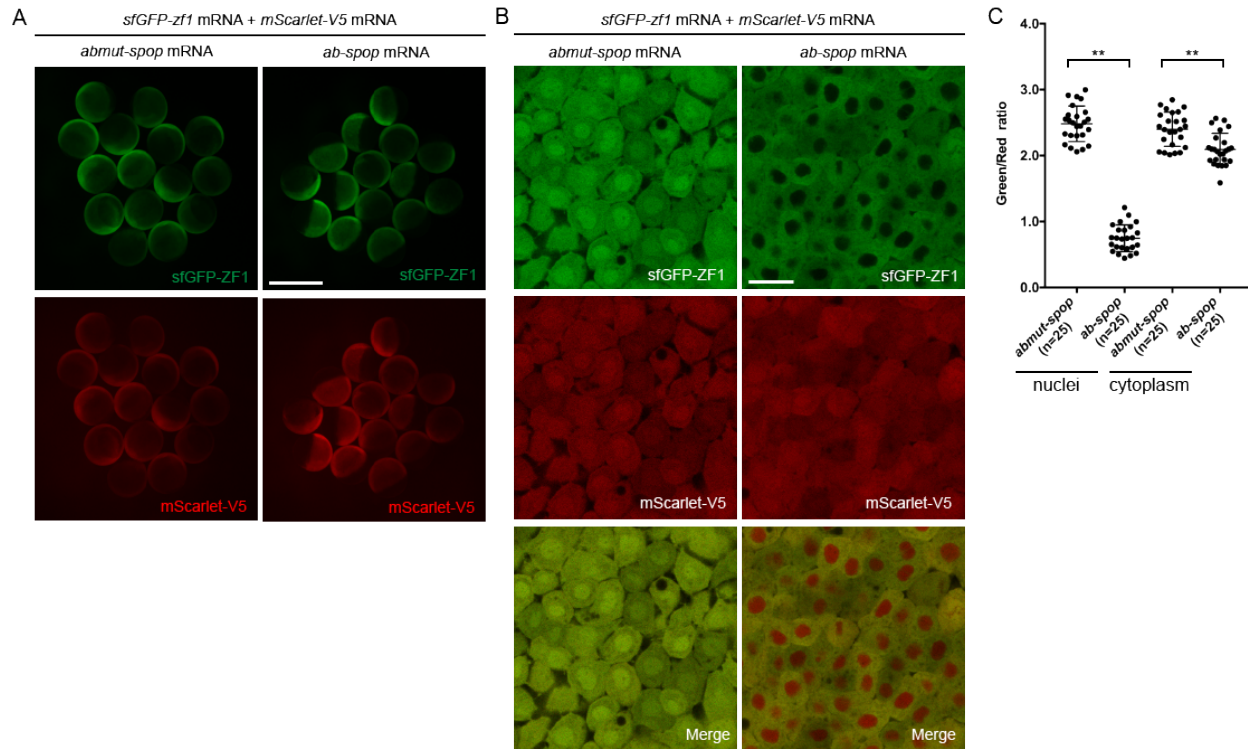

1000

1001

1002 **Figure 1 – figure supplements 3: Characterization of the Ab-SPOP system in zebrafish**

1003 (A) Images of embryos injected with *sfGFP-zf1* mRNA, *mScarlet-V5* mRNA and *abmut-spop*  
1004 mRNA (left in A) or *ab-spop* mRNA (right in A) at 6 hpf. Scale bar: 1 mm.

1005 (B) Single-plane confocal images of cells in embryos injected with *sfGFP-zf1* mRNA, *mScarlet-*  
1006 *V5* mRNA and *abmut-spop* mRNA (left in A) or *ab-spop* mRNA (right in A) at 6 hpf. Scale bar:  
1007 20  $\mu$ m.

1008 (C) Quantification of the sfGFP-to-mScarlet fluorescence intensity ratio in the nuclei and the  
1009 cytoplasm of embryos shown in B. Mean, SD and n are indicated. \*\* =  $p < 0.01$ .

1010

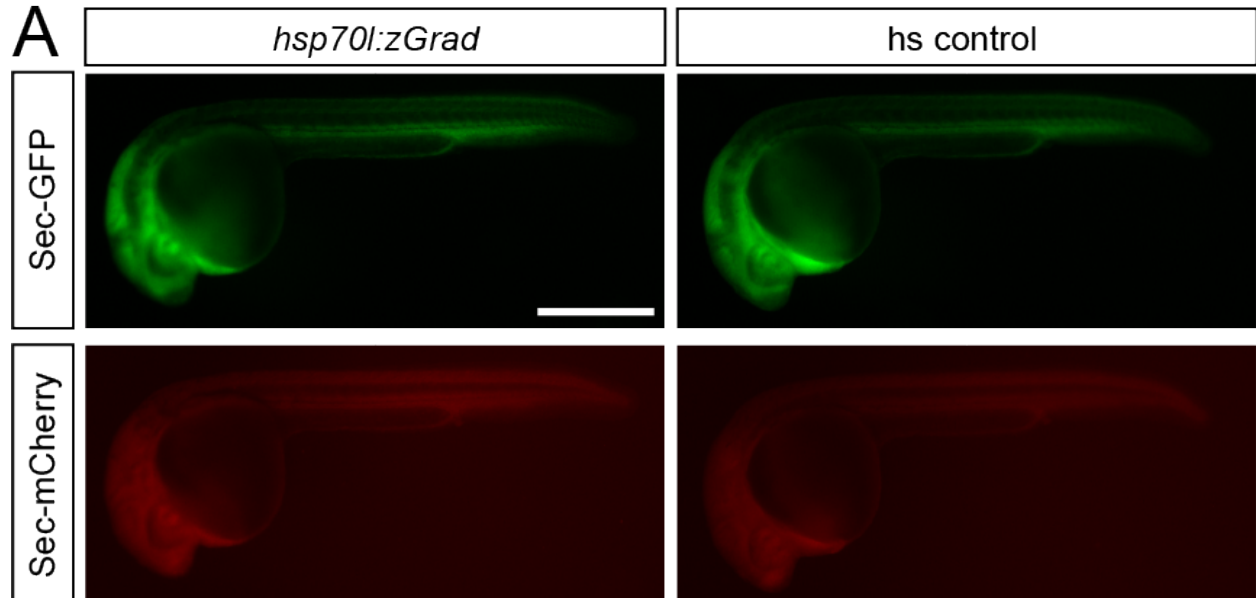

1011

1012

1013 **Figure 2 – figure supplement 1: zGrad does not degrade secreted proteins**

1014 (A) Images of *hsp70l:sec-GFP*; *hsp70:sec-mCherry*; *hsp70l:zGrad* embryos (left) and

1015 *hsp70:sec-GFP*; *hsp70:sec-mCherry* control embryos (right) 5 hours post heat-shock at 30 hpf.

1016 Scale bar: 50  $\mu$ m.

1017

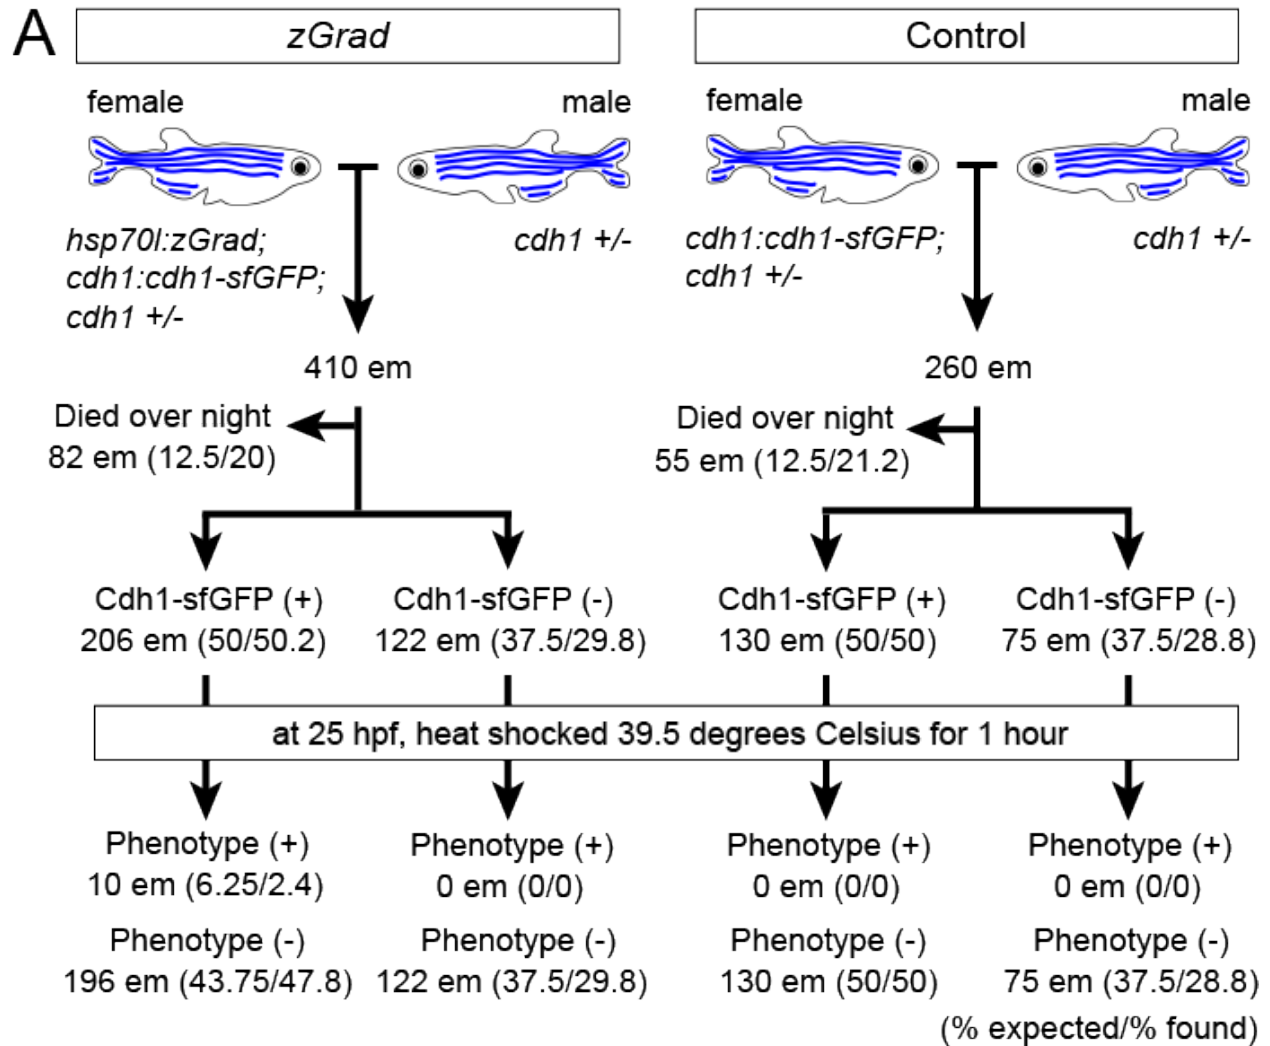

1018

1019

1020 **Figure 4 – figure supplement 1: Expected results for zGrad-induced depletion of sfGFP-**

1021 **tagged Cadherin-1**

1022 (A) Crossing scheme of indicated genotypes and % of embryos with expected and observed

1023 phenotype.

1024

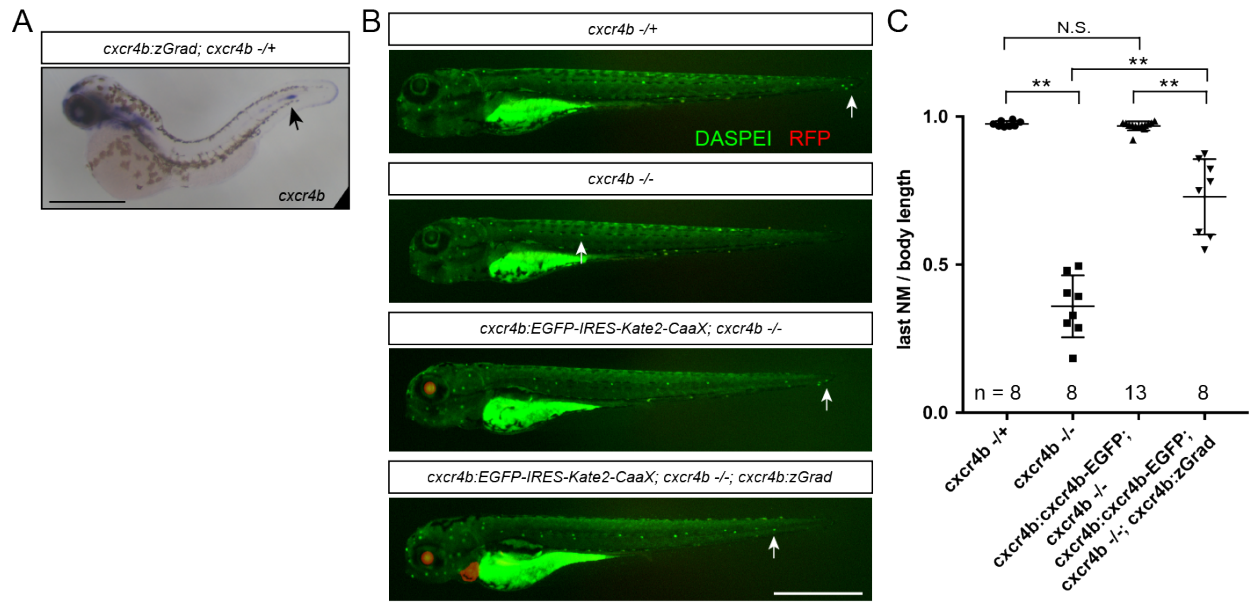

1025

1026

1027 **Figure 6 – figure supplement 1: Tissue-specific Cxcr4b-EGFP degradation by zGrad**

1028 (A) *In situ* hybridization against *cxcr4b* mRNA in a 38 hpf *cxcr4b:zGrad; cxcr4b +/-* embryo.

1029 Arrow indicates the location of the primordium. Scale bar: 0.5 mm.

1030 (B) Images of live embryos of indicated genotypes stained for neuromasts with DASPEI at 4 dpf.

1031 Note that the *cxcr4b:cxcr4b-EGFP-IRES-Kate2-CaaX-p1* transgene carries *cryaa:dsRed*, which

1032 expresses dsRED in the lens, and the *cxcr4b:zGrad* transgene carries *cmic2:mScarlet*, which

1033 expresses mScarlet in the myocardium, as transgenic markers. Arrows indicate the position of

1034 the last neuromast. Scale bar: 1 mm.

1035 (C) Quantification of the position of the last neuromast normalized to body length of embryos

1036 shown in B. \*\* =  $p < 0.01$ , N.S. =  $p > 0.05$ .

1037

1038

1039 **Table 1: *Cdh1* transgenic lines rescue *cdh1* mutants**

1040

| <b>Transgenic line</b>  | <b>Total number of embryos</b> | <b>Transgenic embryos phenotypically wild type</b> | <b>Non-transgenic embryos phenotypically wild type</b> | <b>Embryos phenotypically <i>cdh1</i> mutant</b> |
|-------------------------|--------------------------------|----------------------------------------------------|--------------------------------------------------------|--------------------------------------------------|
| <i>cdh1:cdh1-sfGFP</i>  | 306 (100 %)                    | 149 (47 %)                                         | 96 (33 %)                                              | 61 (20 %)                                        |
| <i>cdh1:cdh1-TagRFP</i> | 432 (100 %)                    | 204 (47 %)                                         | 172 (40 %)                                             | 56 (13%)                                         |

1041

1042

1043

1044

1045

1046

1047

1048

1049

1050

1051

1052

1053

1054

1055

1056

1057 **Table 2: Summary of degradation kinetics**

1058

| <b>FP-Tagged protein</b>    | <b>Promoter expressing zGrad</b> | <b>Percent reduction</b> | <b>Degradation half-life in min</b> | <b>time for onset of degradation in min</b> |
|-----------------------------|----------------------------------|--------------------------|-------------------------------------|---------------------------------------------|
| sfGFP-ZF1                   | mRNA                             | 89 %                     | N/A                                 | N/A                                         |
| Cxcr4b-EGFP                 | <i>cxcr4b</i>                    | 86 %                     | N/A                                 | N/A                                         |
| H2A-EGFP<br>(in somites)    | <i>hsp70l</i>                    | 87 %                     | 156                                 | 200                                         |
| H2A-EGFP<br>(in primordium) | <i>hsp70l</i>                    | 22 %                     | 29*                                 | 140                                         |
| Cdh1-sfGFP                  | <i>hsp70l</i>                    | 79 %                     | 24                                  | 75                                          |
| Ctnna-Citrine               | <i>hsp70l</i>                    | 58 %                     | 19                                  | 65                                          |

1059

1060 \* Note that the zGrad-mediated degradation of H2A-EGFP in the primordium is

1061 obscured by the continued production of H2A-EGFP.

1062

1063 **Figure 2 – Video 1: Degradation of H2A-EGFP by zGrad expressed from *hsp70l* promoter**

1064 Heat-shocked *hsp70l:zGrad; cxcr4b:h2a-EGFP; cxcr4b:h2a-mCherry* embryo (top) and heat-  
1065 shocked *cxcr4b:h2a-EGFP; cxcr4b:h2a-mCherry* control embryo (bottom). Time stamp indicates  
1066 min after the end of the heat shock. Images are maximum-projected. Green: H2A-EGFP, Red:  
1067 H2A-mCherry. Scale bar corresponds to 50  $\mu$ m.

1068

1069 **Figure 2 – Video 2: Degradation of Cdh1-sfGFP by zGrad expressed from *hsp70l***  
1070 **promoter**

1071 Heat-shocked *hsp70l:zGrad; cdh1:cdh1-sfGFP; cdh1:cdh1-TagRFP* embryo (left) and heat-  
1072 shocked *cdh1:cdh1-sfGFP; cdh1:cdh1-TagRFP* control embryo (right). Time stamp indicates  
1073 min after the end of the heat shock. Images are maximum-projected. Green: Cdh1-sfGFP, Red:  
1074 Cdh1-TagRFP. Scale bar corresponds to 10  $\mu$ m.

1075

1076 **Figure 2 – Video 3: Degradation of Ctnna-Citrine by zGrad expressed from *hsp70l***  
1077 **promoter**

1078 Heat-shocked *hsp70l:zGrad; ctnna:ctnna-citrine/+* embryo (left) and heat-shocked *ctnna:ctnna-*  
1079 *citrine/+* control embryo (Right). Time stamp indicates min after the end of the heat shock.  
1080 Images are maximum-projected. Green: Ctnna-Citrine. Scale bar corresponds to 10  $\mu$ m.

1081

1082 **Figure 5 – Video 1: Degradation of Cxcr4b-EGFP by zGrad expressed from *hsp70l***  
1083 **promoter**

1084 Heat-shocked *hsp70l:zGrad; cxcr4b:cxcr4b-EGFP-IRES-Kate2-CaaX-p1; cxcr4b -/-* embryo  
1085 (top) and heat-shocked *cxcr4b:cxcr4b-EGFP-IRES-Kate2-CaaX-p1; cxcr4b -/-* control embryo  
1086 (Bottom). Time stamp indicates min after the end of the heat shock. Images are maximum-  
1087 projected. Green: Cxcr4b-EGFP, Red: Kate2-CaaX. Scale bar corresponds to 50  $\mu$ m.

1088
